# Supplementary material for: Cleavage of acyclic diaminocarbene ligands at an iridium(iii) center. Recognition of a new reactivity mode for carbene ligands
Source: Royal Society of Chemistry journal article supplement (doi:10.1039/c9dt01138b), 2019-01-01
Supplement: c9dt01138b1.pdf [file c9dt01138b1.pdf]

## **Supporting Information**

# **Cleavage of Acyclic Diaminocarbene Ligands at an Iridium(III) Center. Recognition of a New Reactivity Mode for Carbene Ligands**

Mikhail A. Kinzhalov,<sup>\*,a</sup> Anzhelika A. Eremina,<sup>a</sup> Andrey S. Smirnov,<sup>a</sup> Vitalii V. Suslonov,<sup>a</sup>  
Vadim Yu. Kukushkin,<sup>a</sup> Konstantin V. Luzyanin<sup>\*,a,b</sup>

<sup>a</sup>Saint Petersburg State University, 7/9 Universitetskaya Nab., Saint Petersburg, 199034 Russia;

<sup>b</sup>Department of Chemistry, University of Liverpool, Crown Street, Liverpool L69 7ZD, United Kingdom

## Table of Contents

Characterization of isocyanide and diaminocarbene complexes

Table S1. C $\equiv$ N stretching vibration frequency of uncomplexed isocyanides **2a–d** and complexes **[3a–d](OTf)**

Table S2.  $^1\text{H}$  NMR monitoring of reaction between **[3c](OTf)** and  $\text{NH}_3$

Table S3. Overall  $^1\text{H}$  NMR yield and a ratio between **[4c](OTf)** and **6c** in the reaction between **[5c](OTf)** and bases

Scheme S1. Proposed mechanism of base-mediated cleavage of ADC ligands in **[5a–d](OTf)**

Table S4. Crystal data and structures refinement

NMR spectra

## 1. Characterization of isocyanide and diaminocarbene complexes

### 1.1. Characterization of complexes [3a–d](OTf)

Complexes [3a–d](OTf) were characterized by elemental analyses (C, H, N), molar conductivity measurements, TG/DTA, high resolution ESI<sup>+</sup>-MS, IR, 1D (<sup>1</sup>H, <sup>13</sup>C{<sup>1</sup>H}, <sup>19</sup>F{<sup>1</sup>H}) and 2D (<sup>1</sup>H,<sup>1</sup>H COSY, <sup>1</sup>H,<sup>13</sup>C-HMQC/<sup>1</sup>H,<sup>13</sup>C-HSQC, <sup>1</sup>H,<sup>13</sup>C-HMBC) NMR spectroscopy. Complexes [3a–d](OTf) gave satisfactory CHN microanalyses, that are consistent with the proposed formulae. The values of molar conductivities of [3a–d](OTf) in MeCN (137–148 Ohm<sup>-1</sup>cm<sup>-1</sup>mol<sup>-1</sup>) agree with the typical range for 1:1 electrolytes (120–160 Ohm<sup>-1</sup>cm<sup>-1</sup>mol<sup>-1</sup> in MeCN<sup>[1]</sup>). The HRESI<sup>+</sup>-MS of [3a–d](OTf) exhibit sets of peaks with the characteristic isotopic distribution due to [M – OTf]<sup>+</sup> ions. The IR spectra of [3a–d](OTf) contain two strong ν(C≡N) bands in the 2145–2156 cm<sup>-1</sup> and 2173–2184 cm<sup>-1</sup> ranges, that is consistent with the *cis* placement of the two isocyanide ligands. Increase of the CN stretching vibration frequency on going from the uncomplexed (2129–2140 cm<sup>-1</sup>; Table S1, ESI) to the coordinated isocyanides [3a–d](OTf) indicates the more pronounced electrophilic character of the C atom of ligated isocyanide and its higher susceptibility to the nucleophilic attack.<sup>[2]</sup> Herein, a small Δν = ν(C≡N)<sub>coord</sub> – ν(C≡N)<sub>free</sub> of *ca.* 30 cm<sup>-1</sup> for [3a–c](OTf) (5 cm<sup>-1</sup> for [3d](OTf)) indicates a limited electrophilic activation of coordinated isocyanides towards reaction with nucleophiles. Known iridium-isocyanide complexes [Ir(F<sub>2</sub>ppy)<sub>2</sub>(CNAr)<sub>2</sub>]PF<sub>6</sub> (Ar = 4-trifluoromethylphenyl, 3,5-bis(trifluoromethyl)phenyl, and 4-nitrophenyl) with more electron-deficient aryl isocyanides have Δν values of 40–70 cm<sup>-1</sup>.<sup>[3]</sup> <sup>1</sup>H and <sup>13</sup>C{<sup>1</sup>H} NMR spectra of [3a–d](OTf) show a single sets of resonances for the ppy and isocyanide ligands suggesting C<sub>2</sub> symmetry. Assignment of <sup>1</sup>H and <sup>13</sup>C{<sup>1</sup>H} NMR signals was aided by <sup>1</sup>H,<sup>1</sup>H-COSY, <sup>1</sup>H,<sup>13</sup>C-HMQC/HSQC, and <sup>1</sup>H,<sup>13</sup>C-HMBC NMR experiments.

### 1.2. Characterization of complexes [5a–d](OTf)

Diaminocarbene species [5a–d](OTf) were obtained as pale yellow solids in 73–86% yields; all [5a–d](OTf) are air- and moisture-stable at 20–160 °C. Complexes [5a–d](OTf) were characterized by elemental analyses (C, H, N), molar conductivity measurements, TG/DTA, high resolution ESI<sup>+</sup>-MS, IR, 1D (<sup>1</sup>H, <sup>13</sup>C{<sup>1</sup>H}, <sup>19</sup>F{<sup>1</sup>H}) and 2D (<sup>1</sup>H,<sup>1</sup>H-COSY, <sup>1</sup>H,<sup>13</sup>C-HMQC/<sup>1</sup>H,<sup>13</sup>C-HSQC, <sup>1</sup>H,<sup>13</sup>C-HMBC, <sup>1</sup>H,<sup>15</sup>N-HSQC, and <sup>1</sup>H,<sup>15</sup>N-HMBC) NMR spectroscopy. In addition, the structure of [5b](OTf) was elucidated by single-crystal X-ray diffraction. Complexes [5a–d](OTf) gave satisfactory CHN microanalyses, that are consistent with the proposed formulae. Values of molar conductivity for [5a–d](OTf) in acetonitrile (129–139 Ohm<sup>-1</sup>cm<sup>-1</sup>mol<sup>-1</sup>) agree well with those for typical 1:1 electrolytes (120–160 Ohm<sup>-1</sup>cm<sup>-1</sup>mol<sup>-1</sup> in MeCN<sup>[1]</sup>). HRESI<sup>+</sup>-MS of [5a–

**d](OTf)** exhibit sets of peaks with the characteristic isotopic distribution due to  $[M - OTf]^+$  ions. IR spectra of **[5a–d](OTf)** display no  $\nu(C\equiv N)$  bands in the range between 2300 and 2100  $\text{cm}^{-1}$ , supporting the transformation of the isocyanide ligands into the aminocarbenes. The medium-intensity bands 3201–3465  $\text{cm}^{-1}$  in the IR spectra of **[5a–d](OTf)** are characteristic of  $\nu(N-H)$  vibrations from the carbene moiety. In the  $^1\text{H}$  NMR spectra the *bis*carbene complexes **[5a–d](OTf)**, emergence of three broad signals, viz.  $\delta_{\text{H}}$  6.95, 7.27, and 7.78 ppm (ratio 1:1:1) due to NH protons suggests a restricted rotation of the  $\text{NH}_2$  group around the C–N bond.  $^{13}\text{C}\{^1\text{H}\}$  NMR are also consistent with the expected structure of **[5a–d](OTf)**. Herein, addition of  $\text{NH}_3$  to the isocyanide group is accompanied with a pronounced downfield  $\delta^{13}\text{C}$  shift of the isocyanide quaternary C atoms to the range that is specific for  $M-C_{\text{carbene}}$  ( $\delta_{\text{C}}$  160–224 ppm).<sup>[4]</sup> The  $C_{\text{carbene}}$  atoms in **[5a–d](OTf)** resonate at ca.  $\delta_{\text{C}}$  194 ppm that is ca. 60 ppm downfield-shifted vs. corresponded peaks in **[3a–d](OTf)** (e.g.  $\delta_{\text{C}}$  134.06 for  $C\equiv N$  in **[3b](OTf)**). Although no  $^{13}\text{C}\{^1\text{H}\}$  NMR data for iridium(III)-ADC complexes have been reported,  $\delta^{13}\text{C}$  values for the  $C_{\text{carbene}}$  atom in our **[5a–d](OTf)** are comparable to those in the known cyclometallated (ADC) $\text{Pt}^{\text{II}}$  complexes  $[(\text{CNN})\text{Pt}\{C(\text{NHR}^1)-(\text{NHR}^2)\}](\text{ClO}_4)$  ( $\text{HCNN}$  = 6-phenyl-2,2'-bipyridine;  $\text{R}^1$  = *t*-Bu, Xyl,  $\text{R}^2$  = Me,  $\text{NH}_2$ ,  $\text{CH}_2\text{Ph}$ ) ( $\delta_{\text{C}}$  185–194).<sup>[5]</sup>

### 1.3. Characterization of complexes **[4a–d](OTf)** and **6a–d**

Complexes **[4b–d](OTf)** and **6a–d** were characterized by elemental analyses (C, H, N), molar conductivities (for **[4b–d](OTf)**), TG/DTA, high resolution  $\text{ESI}^+$ -MS, IR, 1D ( $^1\text{H}$ ,  $^{13}\text{C}\{^1\text{H}\}$ ,  $^{19}\text{F}\{^1\text{H}\}$ ) and 2D ( $^1\text{H}$ ,  $^1\text{H}$ -COSY,  $^1\text{H}$ ,  $^{13}\text{C}$ -HMQC/ $^1\text{H}$ ,  $^{13}\text{C}$ -HSQC,  $^1\text{H}$ ,  $^{13}\text{C}$ -HMBC,  $^1\text{H}$ ,  $^{15}\text{N}$ -HSQC, and  $^1\text{H}$ ,  $^{15}\text{N}$ -HMBC) NMR spectroscopies. Complexes **[4b–d](OTf)** and **6a–d** gave satisfactory CHN microanalyses, that are consistent with the proposed formulae. The values of molar conductivities of **[4b–d](OTf)** in acetonitrile (135–145  $\text{Ohm}^{-1}\text{cm}^{-1}\text{mol}^{-1}$ ) agree with the typical range for 1:1 electrolytes (120–160  $\text{Ohm}^{-1}\text{cm}^{-1}\text{mol}^{-1}$  in  $\text{MeCN}^{[1]}$ ). The HRESI $^+$ -MS of **[4b–d](OTf)**, exhibit sets of peaks  $[M - OTf]^+$  with the characteristic isotopic distribution. The HRESI $^+$ -MS of **6a–d** exhibit quasi-molecular ion peaks ( $[M + \text{H}]^+$  and  $[M + \text{Na}]^+$ ) and set of peaks from  $[M - \text{CN}]^+$ . In the IR spectra of mixed isocyanide–diaminocarbene complexes **[4b–d](OTf)**, we observed only one CN stretching vibration at 2139–2145  $\text{cm}^{-1}$  from isocyanide ligand. The IR spectra of **6a–d** display one strong  $\nu(C\equiv N)$  band in the interval 2090–2092  $\text{cm}^{-1}$ , which emerge at almost the same frequencies as the C-coordinated cyanide group in the iridium(III) complex  $[n\text{-Bu}_4\text{N}][\text{Ir}(\text{ppy})_2(\text{CN})_2]$  ( $\nu(C\equiv N)$  2092  $\text{cm}^{-1}$ ).<sup>[6]</sup> The N–H resonances in the  $^1\text{H}$  NMR spectra of **[4b–d](OTf)** and **6a–d** were not detected. The  $C_{\text{carbene}}=\text{NH}$  atoms in **[4b–d](OTf)** and **6a–c** were found to resonate at ca.  $\delta_{\text{C}}$  189 ppm and ca.  $\delta_{\text{C}}$  193 ppm, respectively; insufficient solubility of **6d** precluded  $^{13}\text{C}$  measurements.

**Table S1.** C≡N stretching vibration frequency of uncomplexed isocyanides **2a–d** and complexes **[3a–d](OTf)**

| <b>X</b>         | <b><math>\nu</math> (C≡N), <math>\text{cm}^{-1}</math></b> |                 |                               |
|------------------|------------------------------------------------------------|-----------------|-------------------------------|
|                  | <b>2</b>                                                   | <b>[3](OTf)</b> | <b><math>\Delta\nu</math></b> |
| <b>a: X = F</b>  | 2129                                                       | 2156; 2184      | +27                           |
| <b>b: X = Cl</b> | 2123                                                       | 2151; 2179      | +28                           |
| <b>c: X = Br</b> | 2123                                                       | 2151; 2180      | +28                           |
| <b>d: X = I</b>  | 2140                                                       | 2145; 2173      | +5                            |

**Table S2.**  $^1\text{H}$  NMR monitoring of reaction<sup>a</sup> between **[3c](OTf)** and  $\text{NH}_3$ 

| <b>No.</b> | <b>Time</b> | <b>[3c](OTf)</b> | <b>[4c](OTf)</b> | <b>[5c](OTf)</b> | <b>6c</b> |
|------------|-------------|------------------|------------------|------------------|-----------|
| <b>1</b>   | 0           | 100%             | 0%               | 0%               | 0%        |
| <b>2</b>   | 1 h         | 80%              | 20%              | 0%               | 0%        |
| <b>3</b>   | 2 h         | 45%              | 55%              | 0%               | 0%        |
| <b>4</b>   | 3 h         | 20%              | 70%              | 10%              | 0%        |
| <b>5</b>   | 10 h        | 0%               | 50%              | 50%              | 0%        |
| <b>6</b>   | 1 d         | 0%               | 30%              | 60%              | 10%       |
| <b>7</b>   | 4 d         | 0%               | 10%              | 30%              | 60%       |
| <b>8</b>   | 6 d         | 0%               | 0%               | 15%              | 85%       |
| <b>9</b>   | 8 d         | 0%               | 0%               | 0%               | 100%      |

<sup>a</sup>Reaction conditions: complex **[3c](OTf)** (0.005 mmol) was suspended in  $\text{CD}_2\text{Cl}_2$  (1 mL) in a small glass vial. Vial was carefully placed in a larger scintillation flask (20mL) containing 5mL of aqueous ammonia (14M) at the bottom and kept at RT for the duration of reaction.

**Table S3.** Overall  $^1\text{H}$  NMR yield and a ratio between **[4c](OTf)** and **6c** in the reaction between **[5c](OTf)** and bases.

| Solvent and reagents                                                                                               | Time | Overall $^1\text{H}$ NMR yield of <b>[4c](OTf)</b> and <b>6c</b> , % | Ratio between <b>[4c](OTf)</b> and <b>6c</b> |
|--------------------------------------------------------------------------------------------------------------------|------|----------------------------------------------------------------------|----------------------------------------------|
| $\text{CH}_2\text{Cl}_2$ , gaseous $\text{NH}_3$ atmosphere ( $\text{pK}_a = 9.25$ ) <sup>a</sup> , RT             | 8 d  | >99                                                                  | only <b>6c</b>                               |
| $\text{C}_2\text{H}_4\text{Cl}_2$ , gaseous $\text{NH}_3$ atmosphere ( $\text{pK}_a = 9.25$ ) <sup>a</sup> , 50 °C | 3 d  | >99                                                                  | only <b>6c</b>                               |
| MeOH, gaseous $\text{NH}_3$ atmosphere ( $\text{pK}_a = 9.25$ ) <sup>a</sup> , 50 °C                               | 12 h | 52                                                                   | only <b>6c</b>                               |
| MeOH, gaseous $\text{NH}_3$ atmosphere ( $\text{pK}_a = 9.25$ ) <sup>a</sup> , 50 °C                               | 1 d  | 72                                                                   | only <b>6c</b>                               |
| MeOH, gaseous $\text{NH}_3$ atmosphere ( $\text{pK}_a = 9.25$ ) <sup>a</sup> , 50 °C                               | 2 d  | 96                                                                   | only <b>6c</b>                               |
| MeOH, gaseous $\text{NH}_3$ atmosphere ( $\text{pK}_a = 9.25$ ) <sup>a</sup> , 50 °C                               | 3 d  | >99                                                                  | only <b>6c</b>                               |
| MeOH, $(\text{HOCH}_2\text{CH}_2)_3\text{N}$ ( $\text{pK}_a = 7.74$ ) <sup>a,b</sup> , 50 °C                       | 2 d  | >99                                                                  | only <b>[4c](OTf)</b>                        |
| MeOH, pyridine ( $\text{pK}_a = 5.25$ ) <sup>a,b</sup> , 50 °C                                                     | 2 d  | >99                                                                  | only <b>[4c](OTf)</b>                        |
| MeOH, <i>N</i> -methylmorpholine ( $\text{pK}_a = 7.38$ ) <sup>a,b</sup> , 50 °C                                   | 2 d  | >99                                                                  | only <b>[4c](OTf)</b>                        |
| MeOH, $\text{NH}_4\text{Cl}$ (excess)+ $\text{K}_2\text{CO}_3$ <sup>c</sup> , 50 °C                                | 2 d  | >99                                                                  | only <b>[4c](OTf)</b>                        |
| MeOH, $\text{NH}_4\text{Cl}$ (excess)+ $\text{KOH}$ <sup>c</sup> , 50 °C                                           | 2 d  | >99                                                                  | only <b>[4c](OTf)</b>                        |
| MeOH, $\text{Et}_3\text{N}$ ( $\text{pK}_a = 10.75$ ) <sup>a,b</sup> , 50 °C                                       | 12 h | 41                                                                   | 1:1                                          |
| MeOH, $\text{Et}_3\text{N}$ ( $\text{pK}_a = 10.75$ ) <sup>a,b</sup> , 50 °C                                       | 1 d  | 60                                                                   | 1:1                                          |
| MeOH, $\text{Et}_3\text{N}$ ( $\text{pK}_a = 10.75$ ) <sup>a,b</sup> , 50 °C                                       | 2 d  | >99                                                                  | 1:1                                          |
| MeOH, $\text{KOH}$ <sup>b</sup> , 50 °C                                                                            | 1 d  | >99                                                                  | 1:1                                          |
| MeOH, $\text{NH}_4\text{Cl}$ <sup>b</sup> , 50 °C                                                                  | 1 d  | 0                                                                    | —                                            |
| MeOH, 50 °C                                                                                                        | 4 d  | 0                                                                    | —                                            |

<sup>a</sup>The  $\text{pK}_a$  of the conjugate acid in water. <sup>b</sup>Ratio **[5c](OTf)** to organic base was 1:2. <sup>c</sup>Ratio **[5c](OTf)**: $\text{NH}_4\text{Cl}$ :base is 1:10:1.

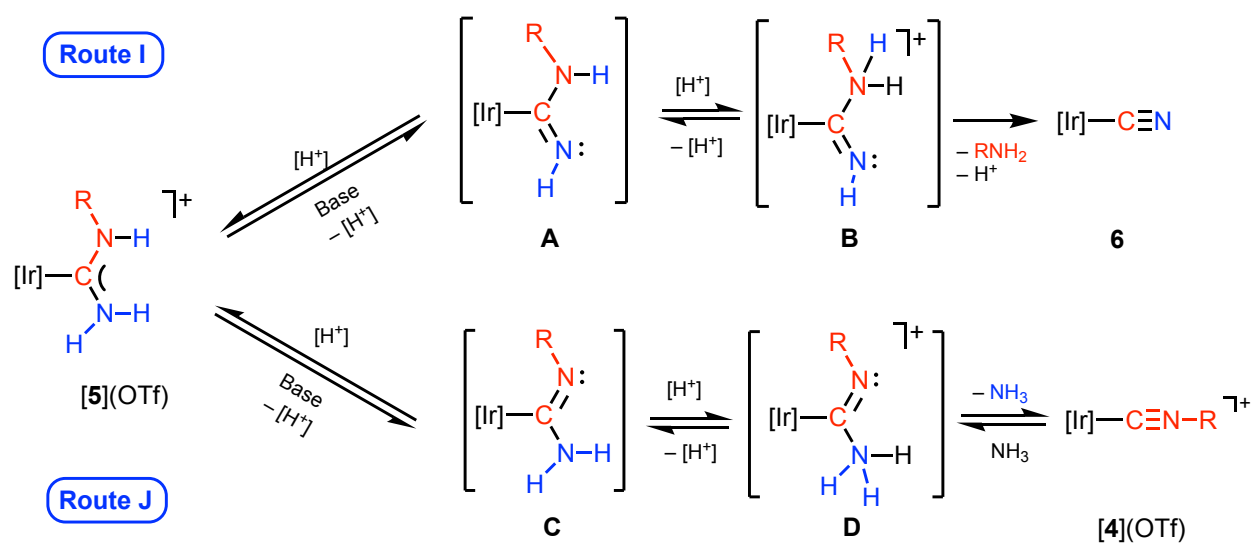

**Scheme S1.** Proposed mechanism of base-mediated cleavage of ADC ligands in **[5a–d](OTf)**.

**Table S4.** Crystal data and structures refinement.

| <i>Identification code</i>                        | <i>[3b](OTf)</i>                                                                                 | <i>[3c](OTf)</i>                                                                                 |
|---------------------------------------------------|--------------------------------------------------------------------------------------------------|--------------------------------------------------------------------------------------------------|
| <i>Empirical formula</i>                          | C <sub>37</sub> H <sub>24</sub> Cl <sub>2</sub> F <sub>3</sub> IrN <sub>4</sub> O <sub>3</sub> S | C <sub>37</sub> H <sub>24</sub> Br <sub>2</sub> F <sub>3</sub> IrN <sub>4</sub> O <sub>3</sub> S |
| <i>Formula weight</i>                             | 924.76                                                                                           | 1013.68                                                                                          |
| <i>Temperature/K</i>                              | 100(2)                                                                                           | 100(2)                                                                                           |
| <i>Crystal system</i>                             | monoclinic                                                                                       | monoclinic                                                                                       |
| <i>Space group</i>                                | P2 <sub>1</sub> /n                                                                               | P2 <sub>1</sub> /c                                                                               |
| <i>a/Å</i>                                        | 11.1328(3)                                                                                       | 10.89737(11)                                                                                     |
| <i>b/Å</i>                                        | 14.0956(4)                                                                                       | 21.25955(19)                                                                                     |
| <i>c/Å</i>                                        | 22.0626(7)                                                                                       | 15.54005(14)                                                                                     |
| <i>α/°</i>                                        | 90                                                                                               | 90                                                                                               |
| <i>β/°</i>                                        | 100.734(2)                                                                                       | 95.7060(8)                                                                                       |
| <i>γ/°</i>                                        | 90                                                                                               | 90                                                                                               |
| <i>Volume/Å<sup>3</sup></i>                       | 3401.55(17)                                                                                      | 3582.37(6)                                                                                       |
| <i>Z</i>                                          | 4                                                                                                | 4                                                                                                |
| <i>ρ<sub>calc</sub>/g/cm<sup>3</sup></i>          | 1.806                                                                                            | 1.879                                                                                            |
| <i>μ/mm<sup>-1</sup></i>                          | 4.205                                                                                            | 10.877                                                                                           |
| <i>F(000)</i>                                     | 1808.0                                                                                           | 1952.0                                                                                           |
| <i>Crystal size/mm<sup>3</sup></i>                | 0.2 × 0.2 × 0.15                                                                                 | 0.15 × 0.15 × 0.08                                                                               |
| <i>Radiation</i>                                  | MoKα (λ = 0.71073)                                                                               | CuKα (λ = 1.54184)                                                                               |
| <i>2θ range for data collection/°</i>             | 5.326 to 54.998                                                                                  | 7.068 to 152.89                                                                                  |
| <i>Index ranges</i>                               | -14 ≤ h ≤ 8, -18 ≤ k ≤ 11, -23 ≤ l ≤ 28                                                          | -13 ≤ h ≤ 13, -26 ≤ k ≤ 26, -19 ≤ l ≤ 19                                                         |
| <i>Reflections collected</i>                      | 15753                                                                                            | 44094                                                                                            |
| <i>Independent reflections</i>                    | 7606 [R <sub>int</sub> = 0.0272, R <sub>sigma</sub> = 0.0425]                                    | 7487 [R <sub>int</sub> = 0.0475, R <sub>sigma</sub> = 0.0260]                                    |
| <i>Data/restraints/parameters</i>                 | 7606/0/460                                                                                       | 7487/0/460                                                                                       |
| <i>Goodness-of-fit on F<sup>2</sup></i>           | 1.181                                                                                            | 1.034                                                                                            |
| <i>Final R indexes [I &gt; 2σ (I)]</i>            | R <sub>1</sub> = 0.0347, wR <sub>2</sub> = 0.0689                                                | R <sub>1</sub> = 0.0300, wR <sub>2</sub> = 0.0779                                                |
| <i>Final R indexes [all data]</i>                 | R <sub>1</sub> = 0.0451, wR <sub>2</sub> = 0.0732                                                | R <sub>1</sub> = 0.0313, wR <sub>2</sub> = 0.0793                                                |
| <i>Largest diff. peak/hole / e Å<sup>-3</sup></i> | 1.52/-0.83                                                                                       | 1.77/-1.05                                                                                       |
| <i>CCDC numbers</i>                               | 1538183                                                                                          | 1538181                                                                                          |



| Identification code                         | [4b](OTf)                                                        | [5b](OTf)                                                                                        | 6c                                                                 |
|---------------------------------------------|------------------------------------------------------------------|--------------------------------------------------------------------------------------------------|--------------------------------------------------------------------|
| Empirical formula                           | C <sub>36</sub> H <sub>26</sub> Cl <sub>2</sub> IrN <sub>5</sub> | C <sub>38</sub> H <sub>31</sub> Cl <sub>5</sub> F <sub>3</sub> IrN <sub>6</sub> O <sub>3</sub> S | C <sub>31</sub> H <sub>24</sub> BrCl <sub>3</sub> IrN <sub>5</sub> |
| Formula weight                              | 791.72                                                           | 1078.20                                                                                          | 845.01                                                             |
| Temperature/K                               | 100(2)                                                           | 100(2)                                                                                           | 100(2)                                                             |
| Crystal system                              | monoclinic                                                       | monoclinic                                                                                       | monoclinic                                                         |
| Space group                                 | P2 <sub>1</sub> /c                                               | P2 <sub>1</sub> /c                                                                               | P2 <sub>1</sub> /c                                                 |
| a/Å                                         | 11.3436(7)                                                       | 13.0467(8)                                                                                       | 14.0167(3)                                                         |
| b/Å                                         | 22.3709(10)                                                      | 30.1504(13)                                                                                      | 12.4881(2)                                                         |
| c/Å                                         | 13.9967(8)                                                       | 10.5444(5)                                                                                       | 19.1229(3)                                                         |
| α/°                                         | 90                                                               | 90                                                                                               | 90                                                                 |
| β/°                                         | 94.676(6)                                                        | 100.392(6)                                                                                       | 105.7660(19)                                                       |
| γ/°                                         | 90                                                               | 90                                                                                               | 90                                                                 |
| Volume/Å <sup>3</sup>                       | 3540.1(3)                                                        | 4079.7(4)                                                                                        | 3221.38(10)                                                        |
| Z                                           | 4                                                                | 4                                                                                                | 4                                                                  |
| ρ <sub>calc</sub> /cm <sup>3</sup>          | 1.485                                                            | 1.755                                                                                            | 1.742                                                              |
| μ/mm <sup>-1</sup>                          | 3.953                                                            | 3.711                                                                                            | 11.993                                                             |
| F(000)                                      | 1552.0                                                           | 2120.0                                                                                           | 1632.0                                                             |
| Crystal size/mm <sup>3</sup>                | 0.2 × 0.2 × 0.2                                                  | 0.1 × 0.1 × 0.08                                                                                 | 0.15 × 0.15 × 0.1                                                  |
| Radiation                                   | MoKα (λ = 0.71073)                                               | MoKα (λ = 0.71073)                                                                               | CuKα (λ = 1.54184)                                                 |
| 2θ range for data collection/°              | 5.75 to 55                                                       | 5.404 to 55                                                                                      | 6.552 to 152.658                                                   |
| Index ranges                                | -14 ≤ h ≤ 14, -29 ≤ k ≤ 28, -18 ≤ l ≤ 18                         | -15 ≤ h ≤ 16, -39 ≤ k ≤ 32, -13 ≤ l ≤ 10                                                         | -17 ≤ h ≤ 17, -14 ≤ k ≤ 15, -24 ≤ l ≤ 16                           |
| Reflections collected                       | 23108                                                            | 20065                                                                                            | 27500                                                              |
| Independent reflections                     | 8132 [R <sub>int</sub> = 0.0307, R <sub>sigma</sub> = 0.0371]    | 9356 [R <sub>int</sub> = 0.0689, R <sub>sigma</sub> = 0.1006]                                    | 6699 [R <sub>int</sub> = 0.0890, R <sub>sigma</sub> = 0.0507]      |
| Data/restraints/parameters                  | 8132/0/397                                                       | 9356/0/481                                                                                       | 6699/6/371                                                         |
| Goodness-of-fit on F <sup>2</sup>           | 1.184                                                            | 1.252                                                                                            | 1.030                                                              |
| Final R indexes [I > 2σ(I)]                 | R <sub>1</sub> = 0.0554, wR <sub>2</sub> = 0.1096                | R <sub>1</sub> = 0.0765, wR <sub>2</sub> = 0.1371                                                | R <sub>1</sub> = 0.0514, wR <sub>2</sub> = 0.1331                  |
| Final R indexes [all data]                  | R <sub>1</sub> = 0.0689, wR <sub>2</sub> = 0.1159                | R <sub>1</sub> = 0.0896, wR <sub>2</sub> = 0.1425                                                | R <sub>1</sub> = 0.0601, wR <sub>2</sub> = 0.1427                  |
| Largest diff. peak/hole / e Å <sup>-3</sup> | 2.95/-2.36                                                       | 2.10/-3.15                                                                                       | 2.40/-3.07                                                         |
| CCDC numbers                                | 1538186                                                          | 1538184                                                                                          | 1538185                                                            |

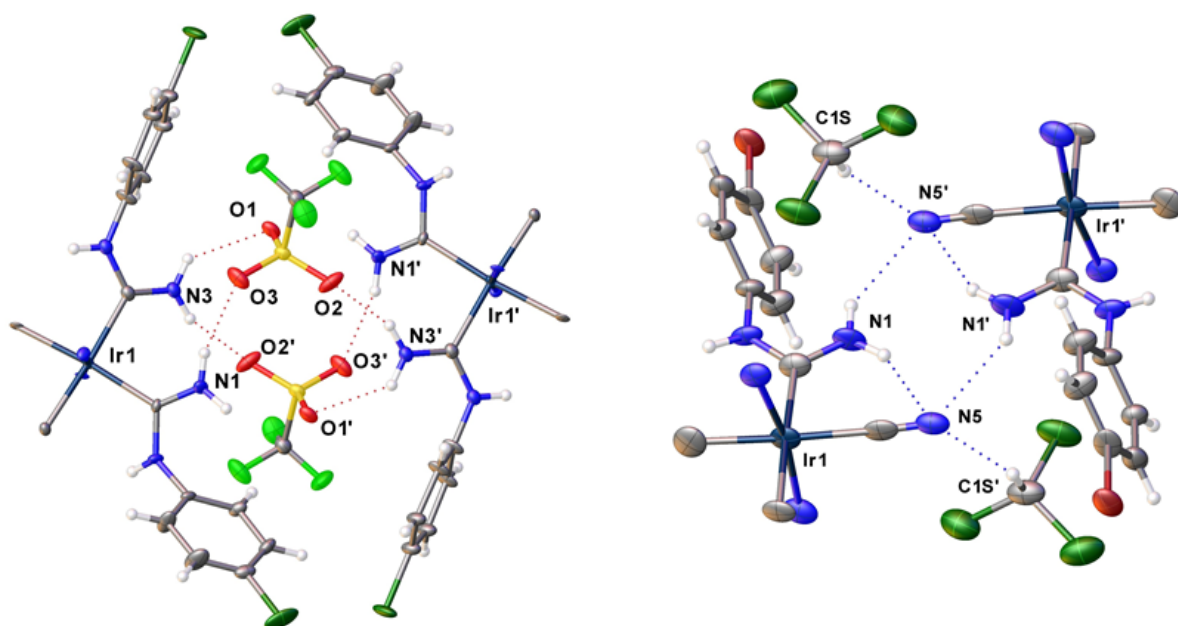

**Figure S1.** View of the H-bonded dimeric associates of **[5b](OTf)** (left) and **6c** (right) with the intermolecular and intramolecular hydrogen bonds. Cyclometalated ligand fragments were omitted for simplicity.

**Table S5.** Selected H-bond lengths and angles for **[5b](OTf)** and **6c**

| [5b](OTf)       |           | 6c           |           |
|-----------------|-----------|--------------|-----------|
| Bond lengths, Å |           |              |           |
| N1–H···O3       | 3.014(9)  | N1–H···N5    | 3.115(9)  |
| N1'–H···O3'     | 3.014(9)  | N1–H···N5'   | 3.401(8)  |
| N3–H···O1       | 2.994(8)  | N5–H···C1S   | 3.225(6)  |
| N3–H···O2'      | 2.883(11) | N1'–H···N5'  | 3.115(9)  |
| N3'–H···O1'     | 2.994(8)  | N1'–H···N5   | 3.401(8)  |
| N3'–H···O2      | 2.883(11) | N5'–H···C1S' | 3.225(6)  |
| Bond angles, °  |           |              |           |
| N1–H···O3       | 161.36(8) | N1–H···N5    | 145.10(8) |
| N1'–H···O3'     | 161.36(8) | N1–H···N5'   | 135.61(7) |
| N3–H···O1       | 125.95(6) | N5–H···C1S   | 145.65(5) |
| N3–H···O2'      | 155.90(7) | N1'–H···N5'  | 145.10(8) |
| N3'–H···O1'     | 125.95(6) | N1'–H···N5   | 135.61(7) |
| N3'–H···O2      | 155.90(7) | N5'–H···C1S' | 145.65(5) |

In the crystal structure of **[5b](OTf)**, N–H···O hydrogen bonds (HBs) between triflate anion from the first molecule and the carbene NH<sub>2</sub> protons of the other molecule, can be recognized. A system of six N–H···O intermolecular HBs link two organometallic cations and two

triflate anions into H-bonded dimeric associates. The heavy atom distance in N3–H $\cdots$ O2' (2.883(11) Å) contact between the NH<sub>2</sub> of the carbene groups and the triflate anion is approximately 0.19 Å shorter than the sum of the Bondi's van der Waals radii for the O and N atoms (3.07 Å<sup>1</sup>). At the same time longer distances in N3–H $\cdots$ O1 (2.994(8) Å) and N1–H $\cdots$ O3 (3.014(9) Å) contacts indicate that these H-bonds between the NH<sub>2</sub> of the carbene groups and the triflate anion are rather weak.

In the crystal structure of **6c**, intermolecular interactions lead to dimeric associates. Hence in this complex, each NH<sub>2</sub> group interacts with two cyanide groups from different molecules giving H-bonded dimers.

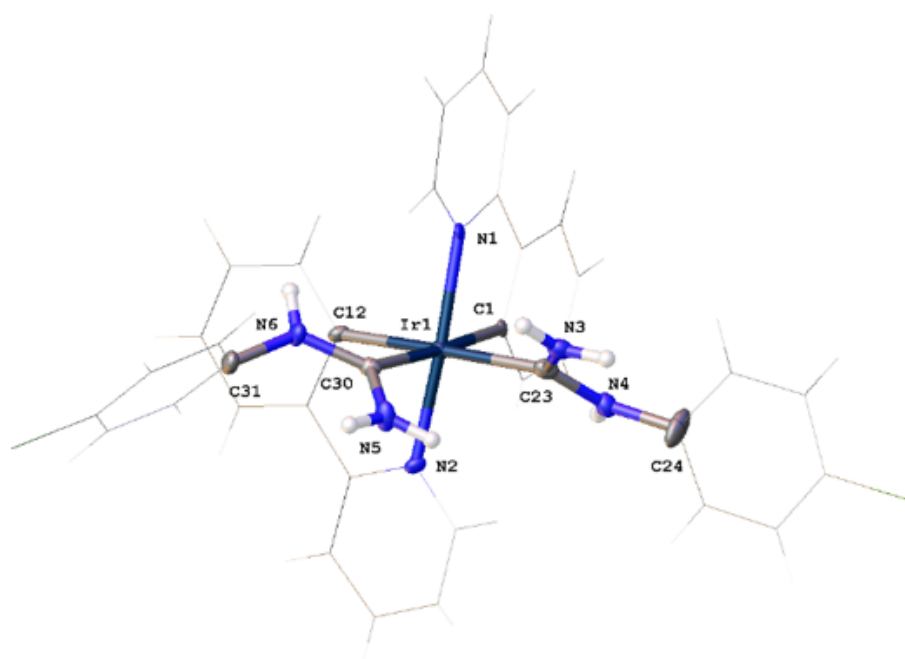

**Figure S2.** Mutual arrangement of the ADC moieties in **[5b]<sup>+</sup>**.

## NMR spectra

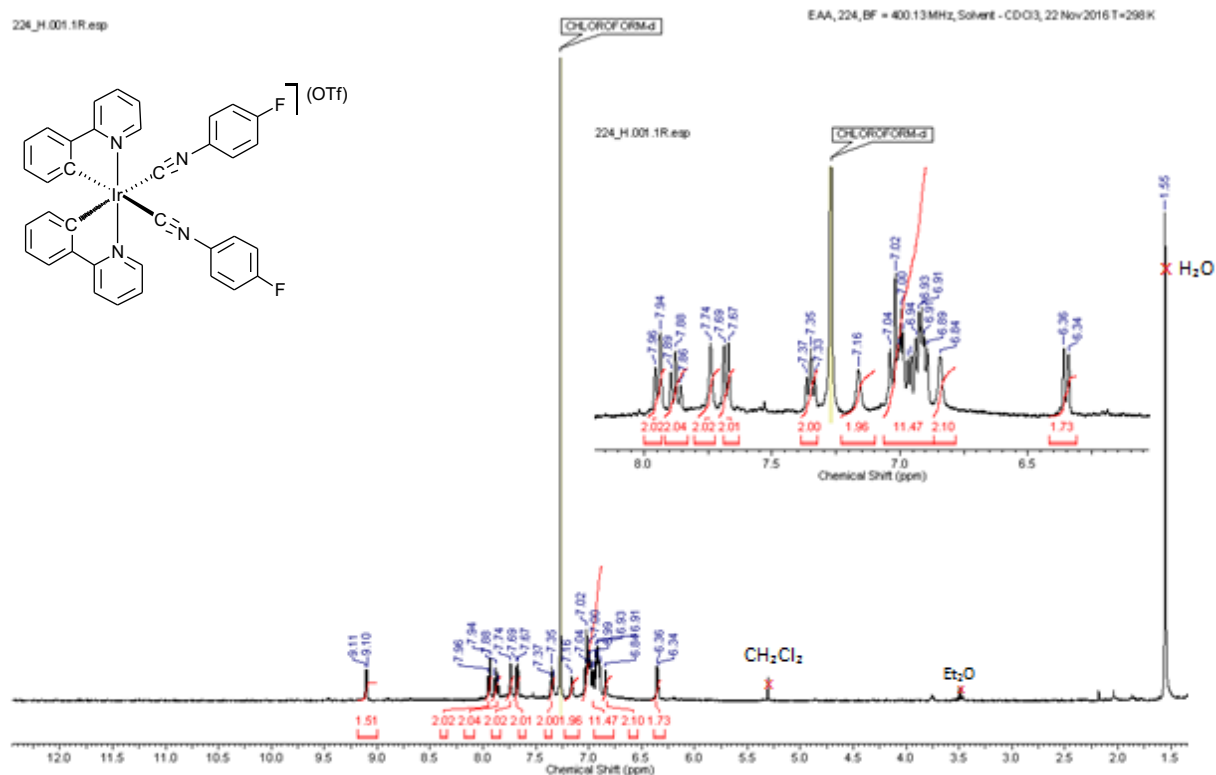

**Figure S3.** <sup>1</sup>H NMR spectrum of [3a](OTf) in CDCl<sub>3</sub>

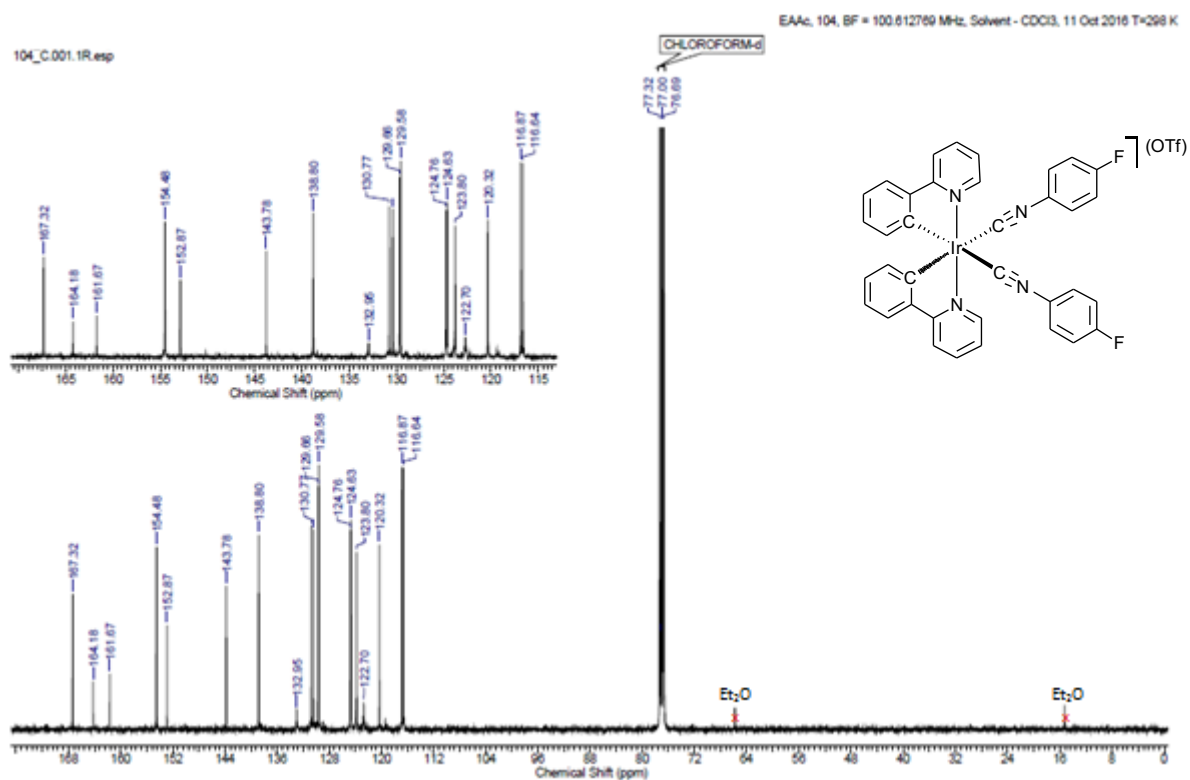

**Figure S4.** <sup>13</sup>C{<sup>1</sup>H} NMR spectrum of [3a](OTf) in CDCl<sub>3</sub>

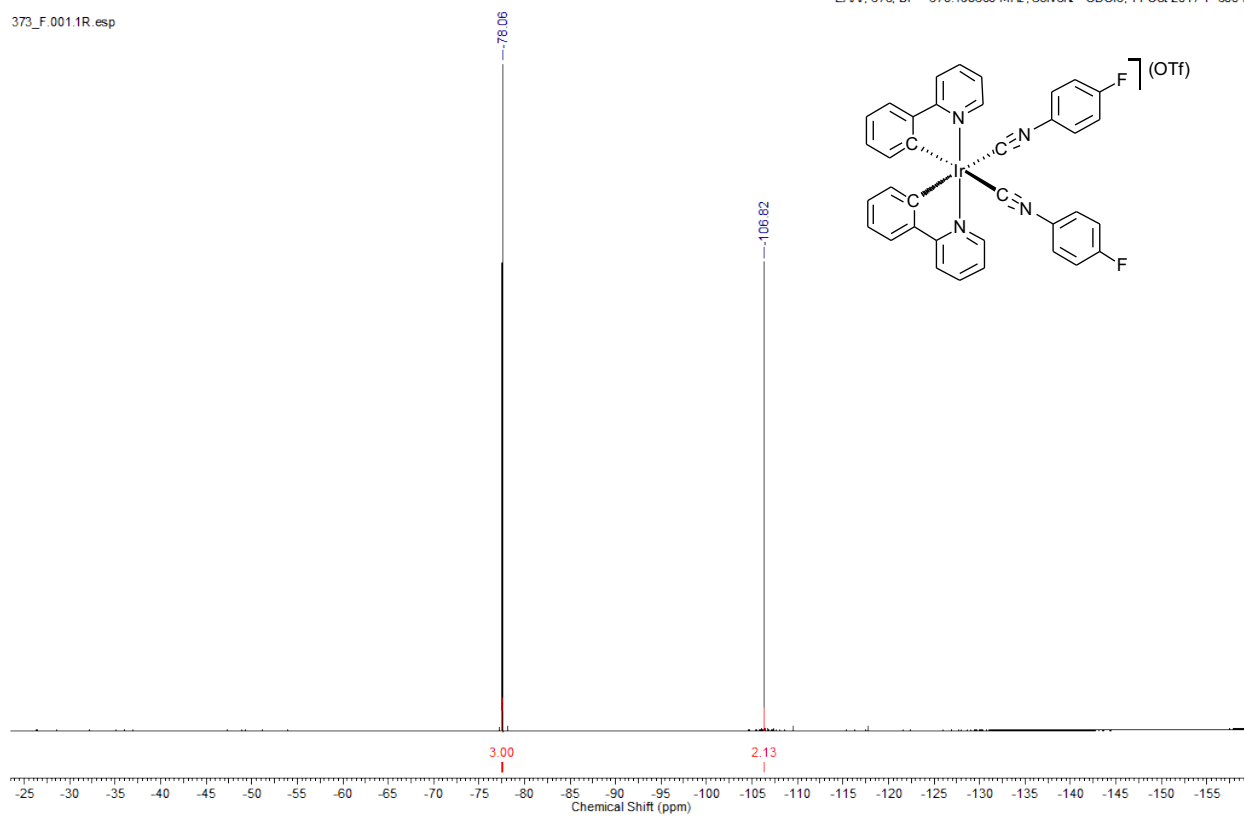

**Figure S5.**  $^{19}\text{F}\{^1\text{H}\}$  NMR spectrum of  $[\mathbf{3a}](\text{OTf})$  in  $\text{CDCl}_3$

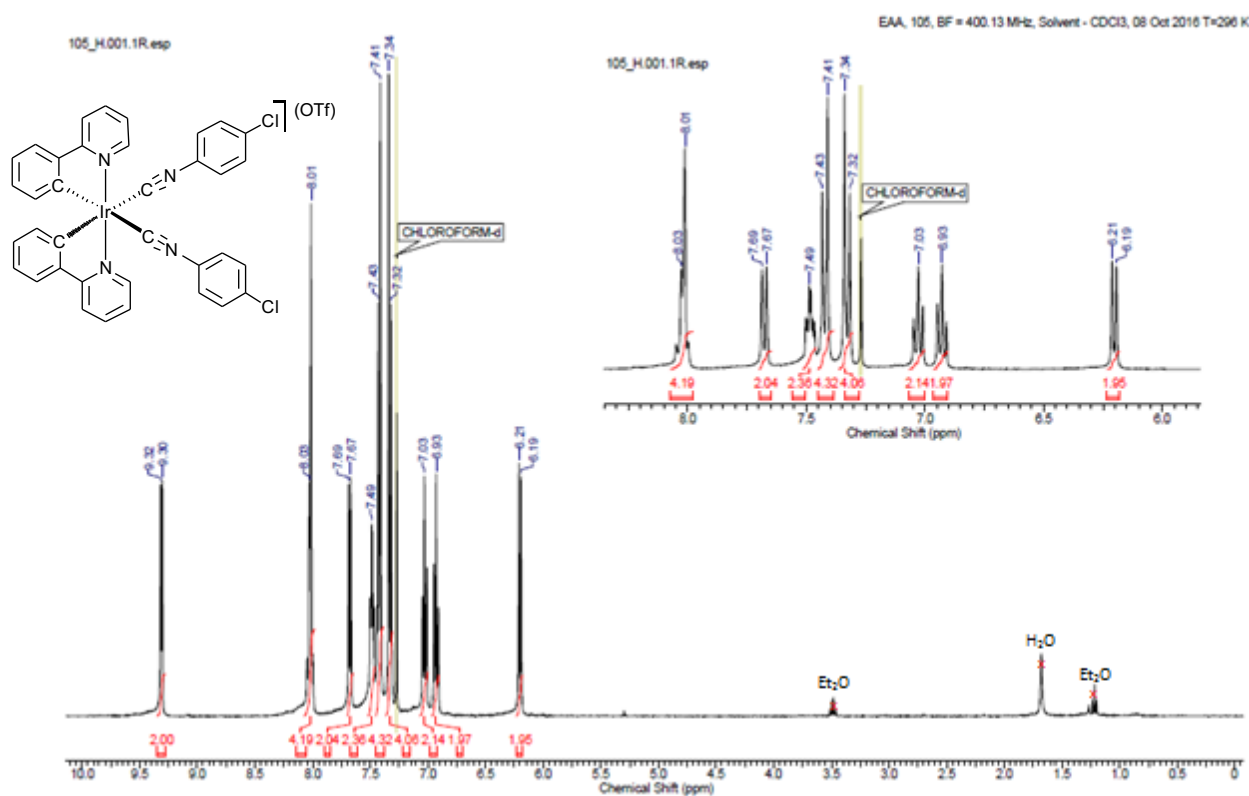

**Figure S6.**  $^1\text{H}$  NMR spectrum of **[3b](OTf)** in  $\text{CDCl}_3$

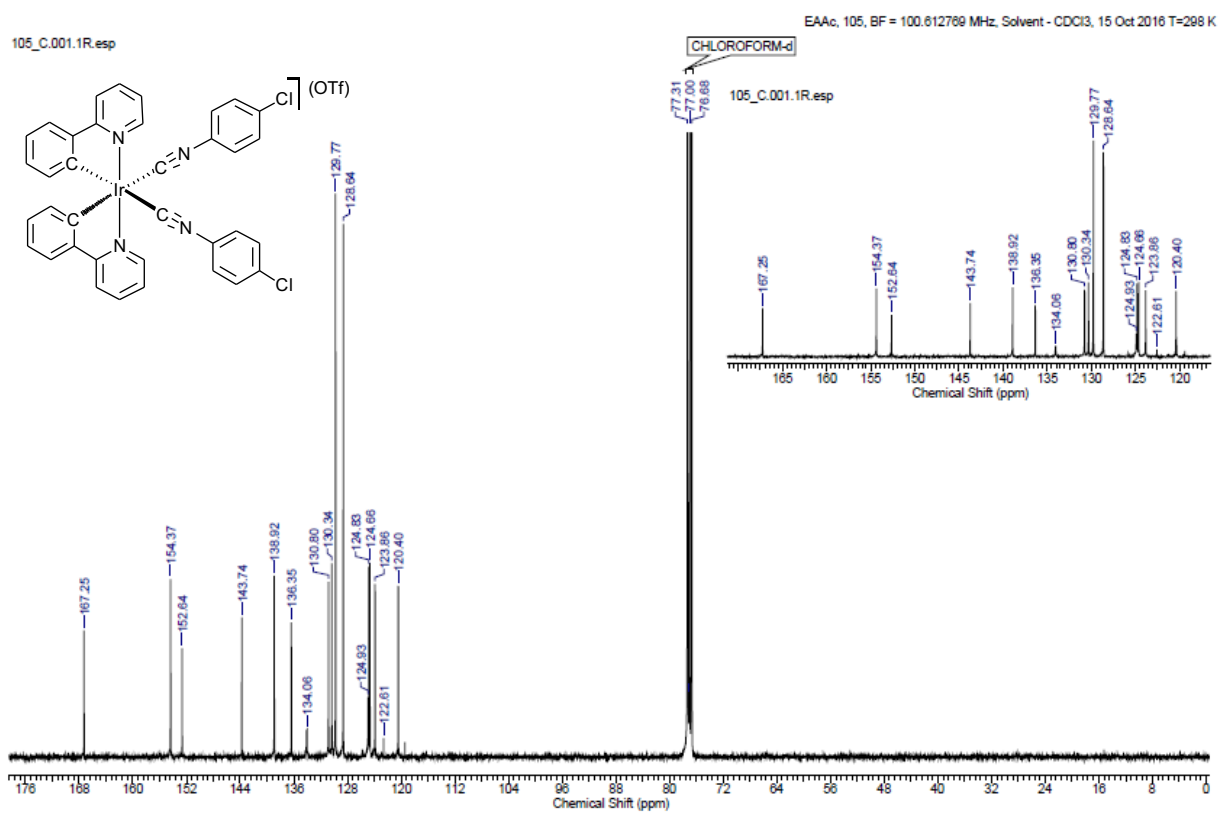

**Figure S7.**  $^{13}\text{C}\{^1\text{H}\}$  NMR spectrum of **[3b](OTf)** in  $\text{CDCl}_3$

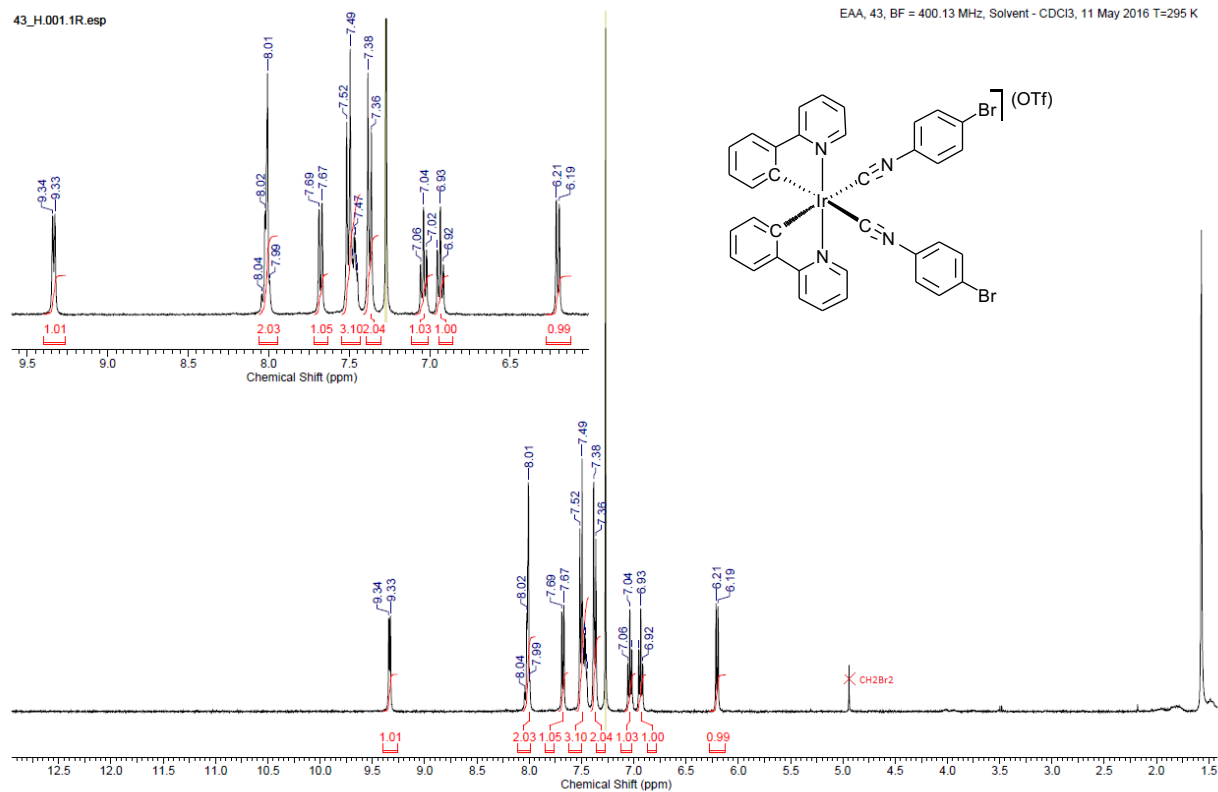

**Figure S8.** <sup>1</sup>H NMR spectrum of [3c](OTf) in CDCl<sub>3</sub>

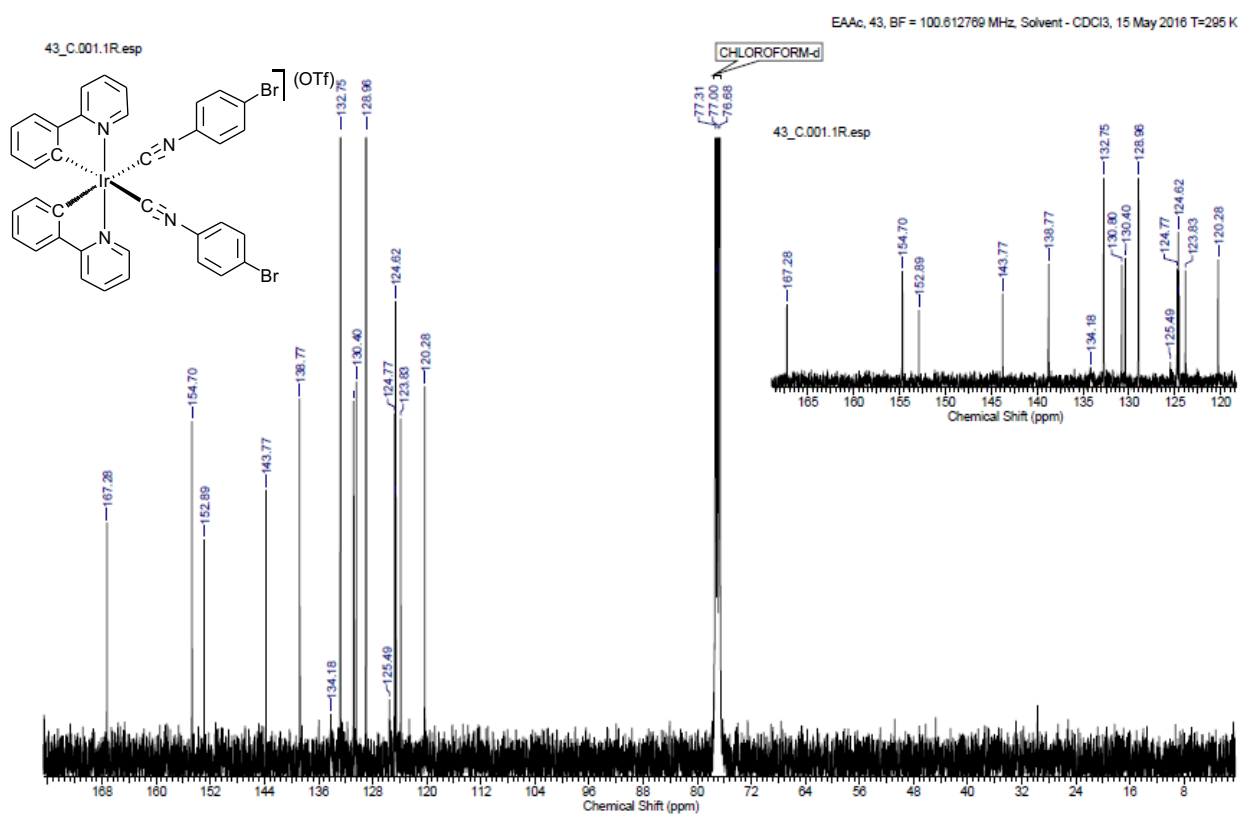

**Figure S9.** <sup>13</sup>C{<sup>1</sup>H} NMR spectrum of [3c](OTf) in CDCl<sub>3</sub>

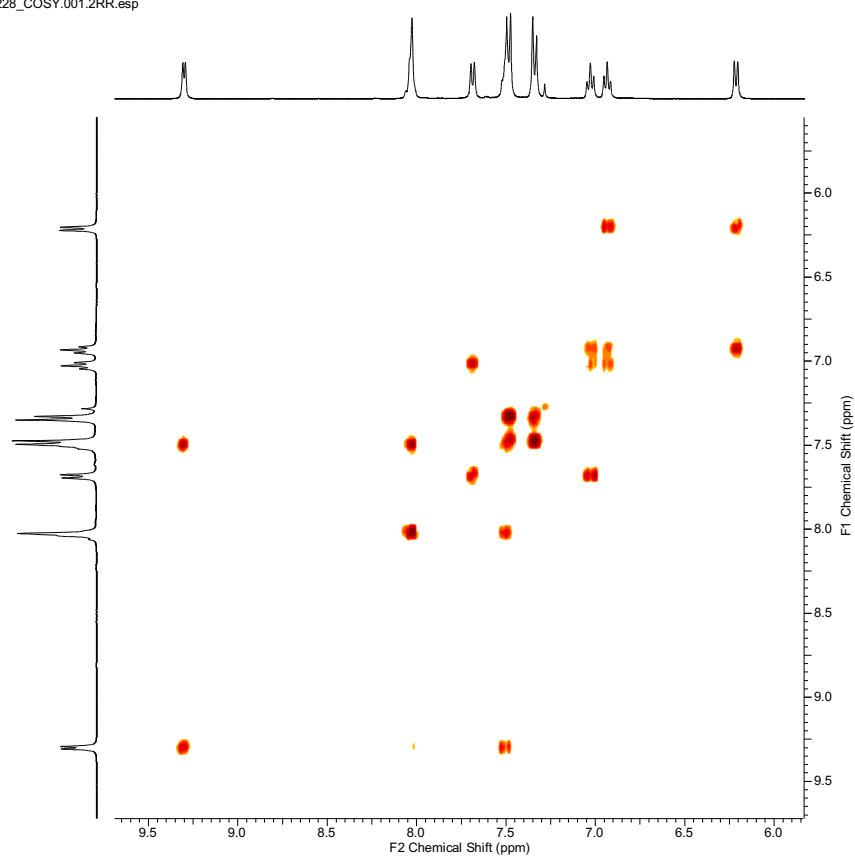

**Figure S10.**  $^1\text{H}$ ,  $^1\text{H}$ -COSY NMR spectrum of  $[\mathbf{3c}](\text{OTf})$  in  $\text{CDCl}_3$

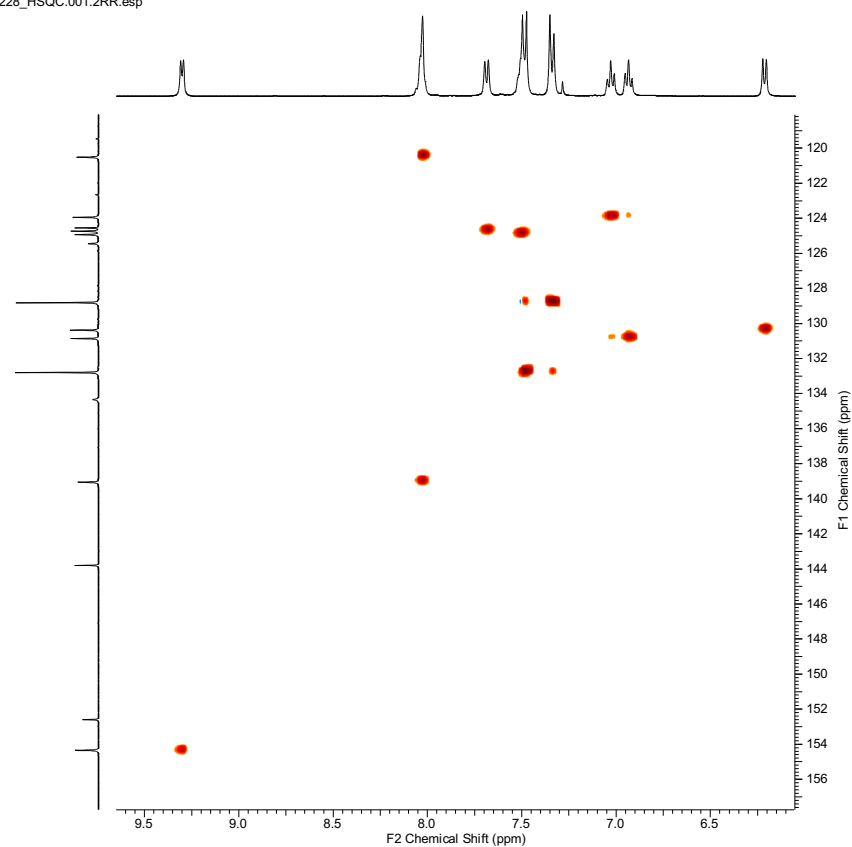

**Figure S11.**  $^1\text{H}$ ,  $^{13}\text{C}$ -HSQC NMR spectrum of  $[\mathbf{3c}](\text{OTf})$  in  $\text{CDCl}_3$



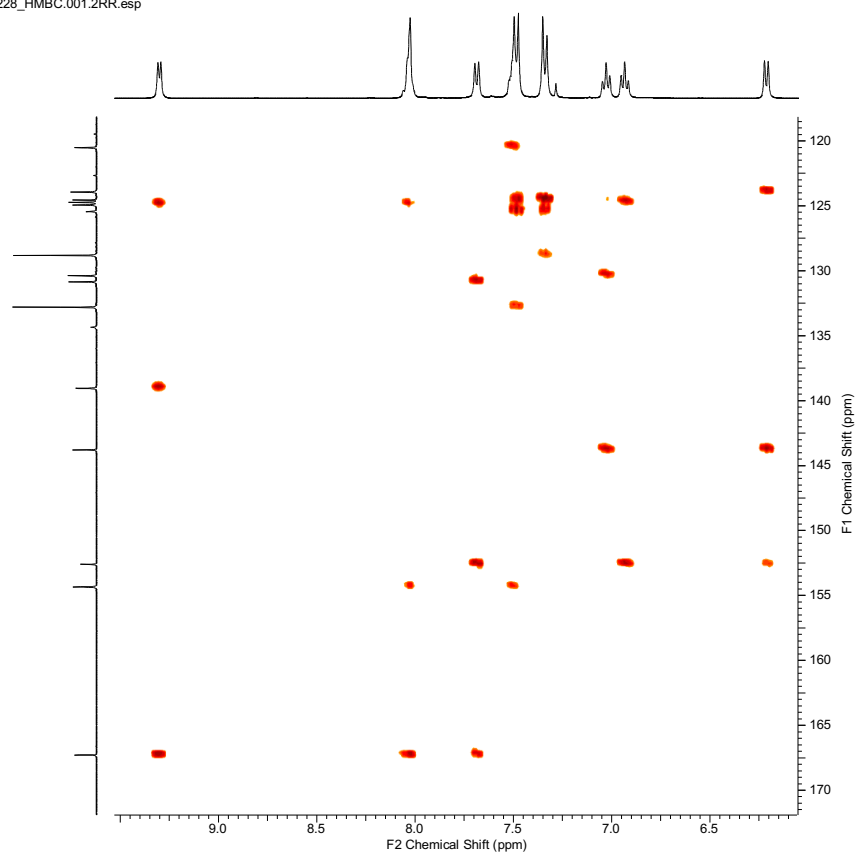

**Figure S12.**  $^1\text{H}$ ,  $^{13}\text{C}$ -HMBC NMR spectrum of **[3c](OTf)** in  $\text{CDCl}_3$



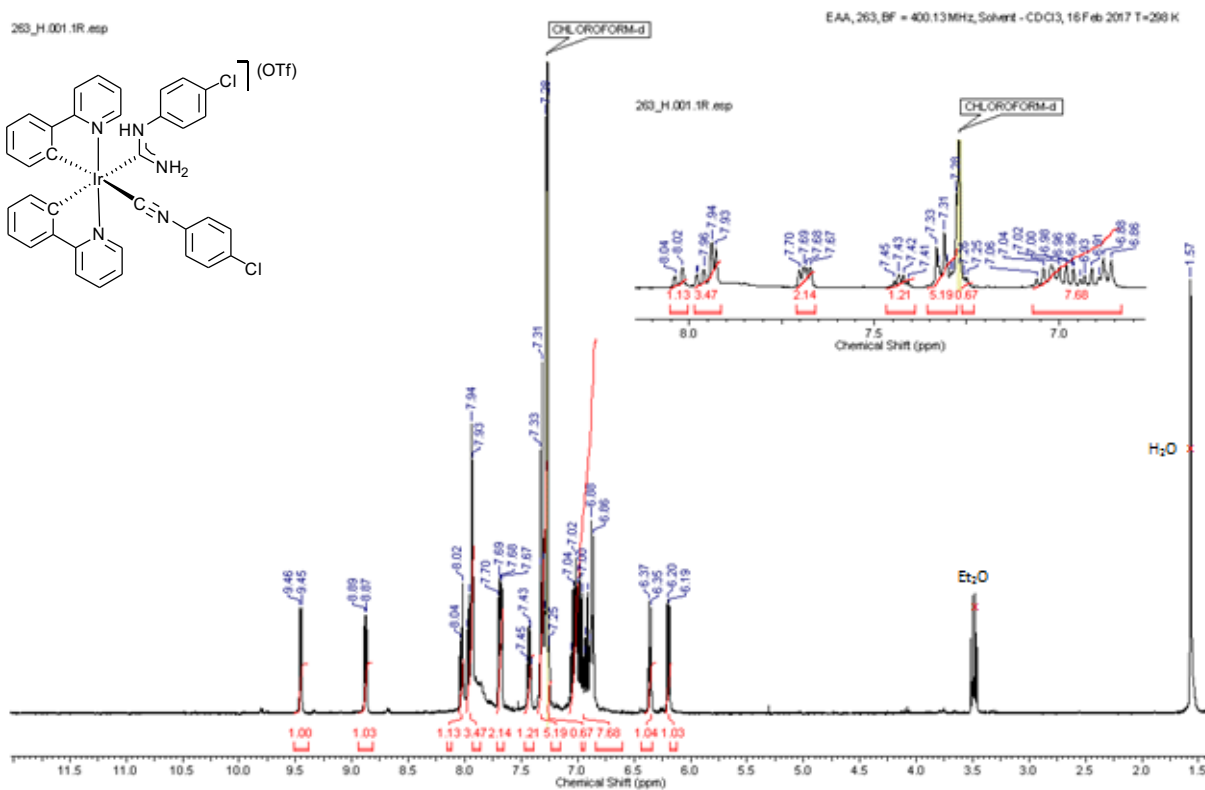

**Figure S15.**  $^1\text{H}$  NMR spectrum of [4b](OTf) in  $\text{CDCl}_3$

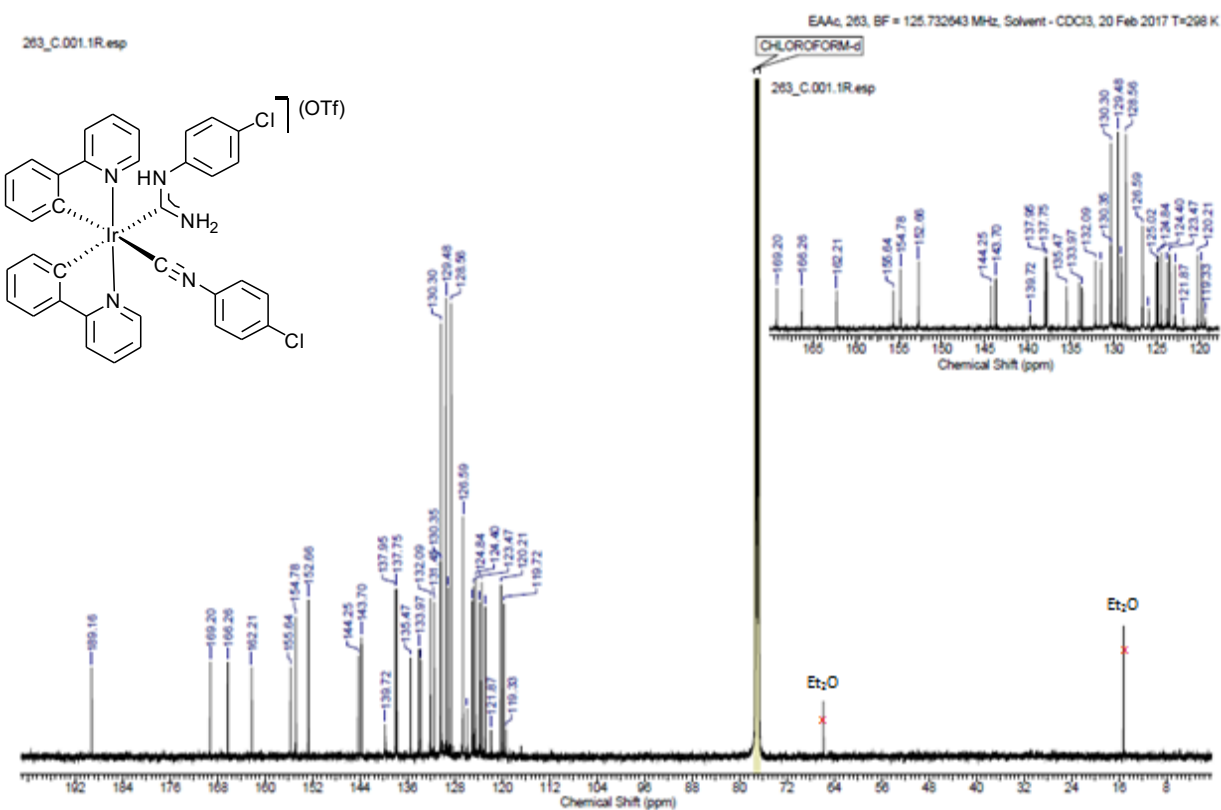

**Figure S16.**  $^{13}\text{C}\{^1\text{H}\}$  NMR spectrum of [4b](OTf) in  $\text{CDCl}_3$

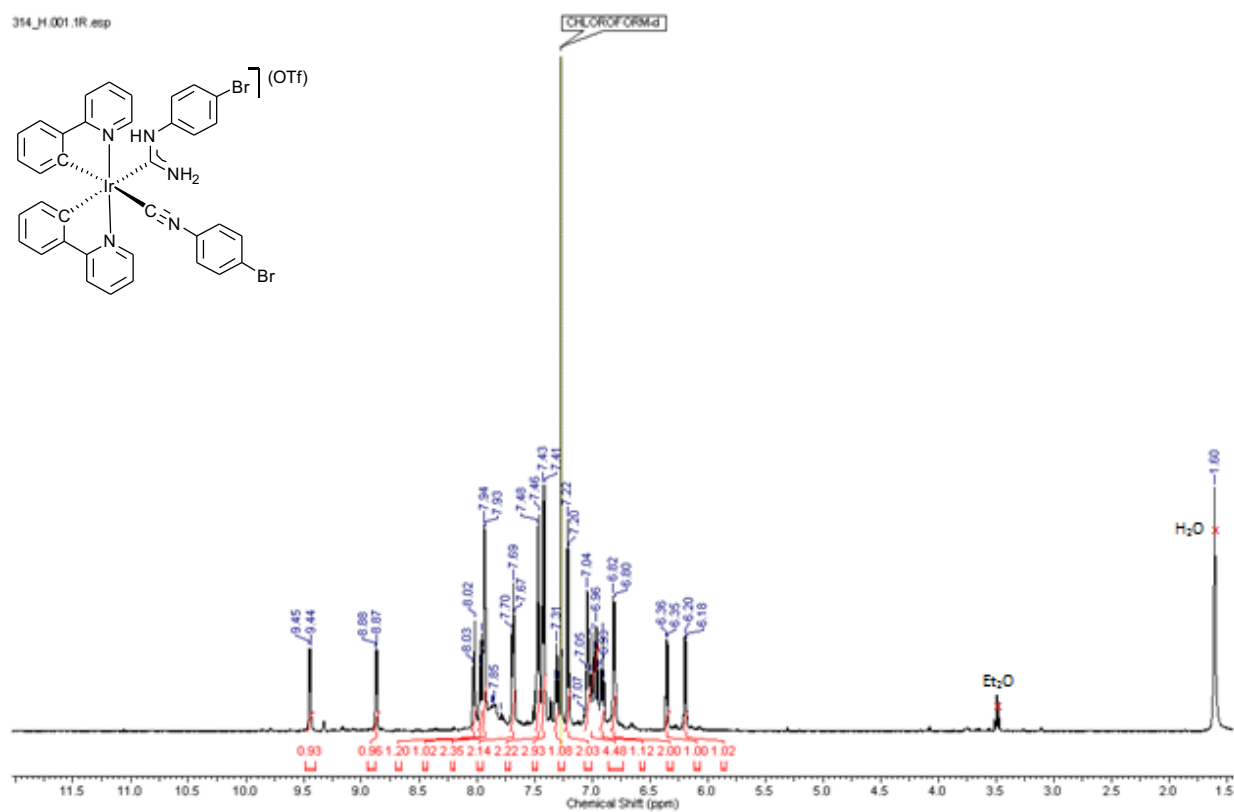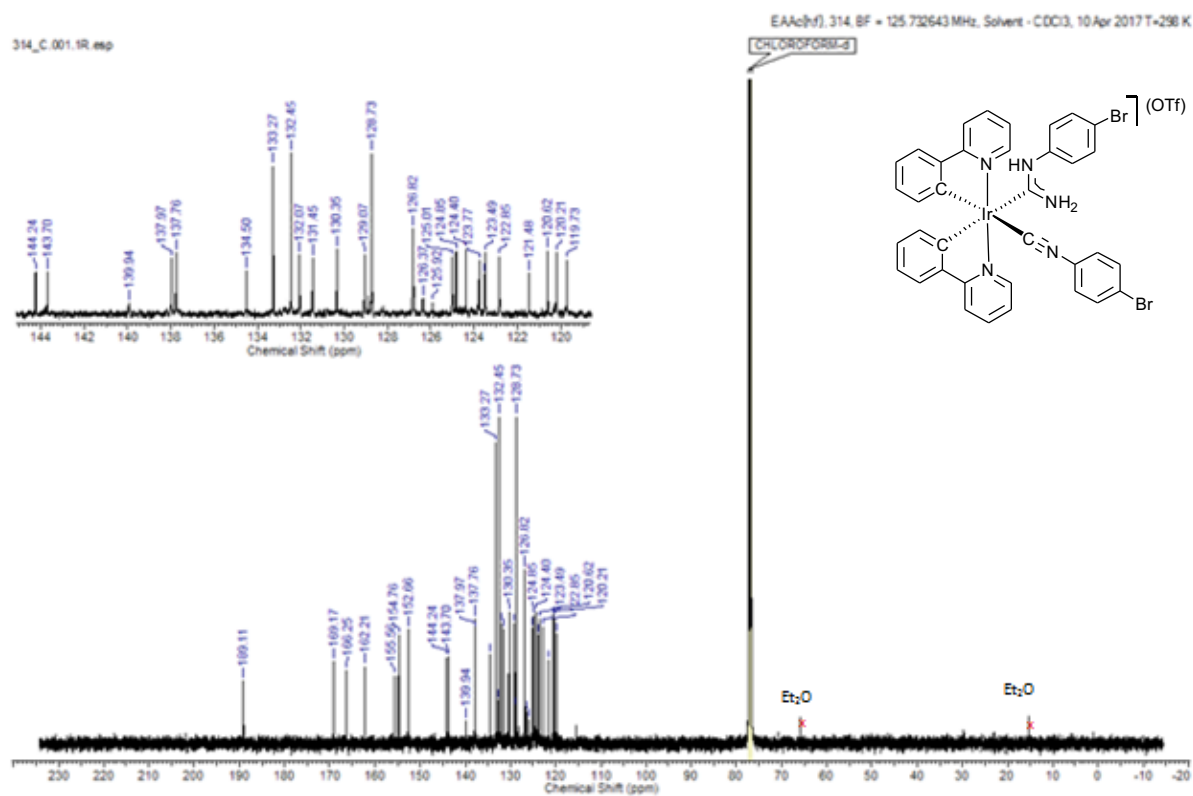

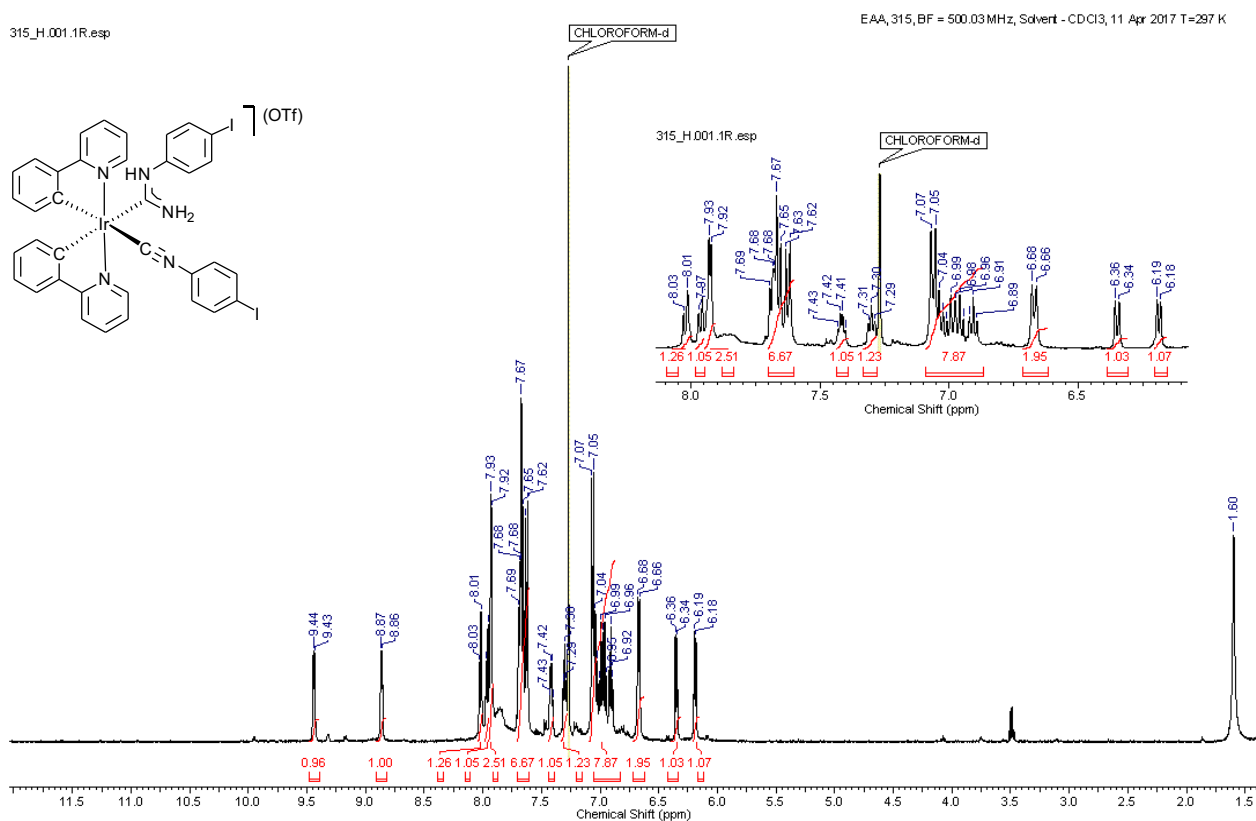

**Figure S19.**  $^1\text{H}$  NMR spectrum of **[4d](OTf)** in  $\text{CDCl}_3$

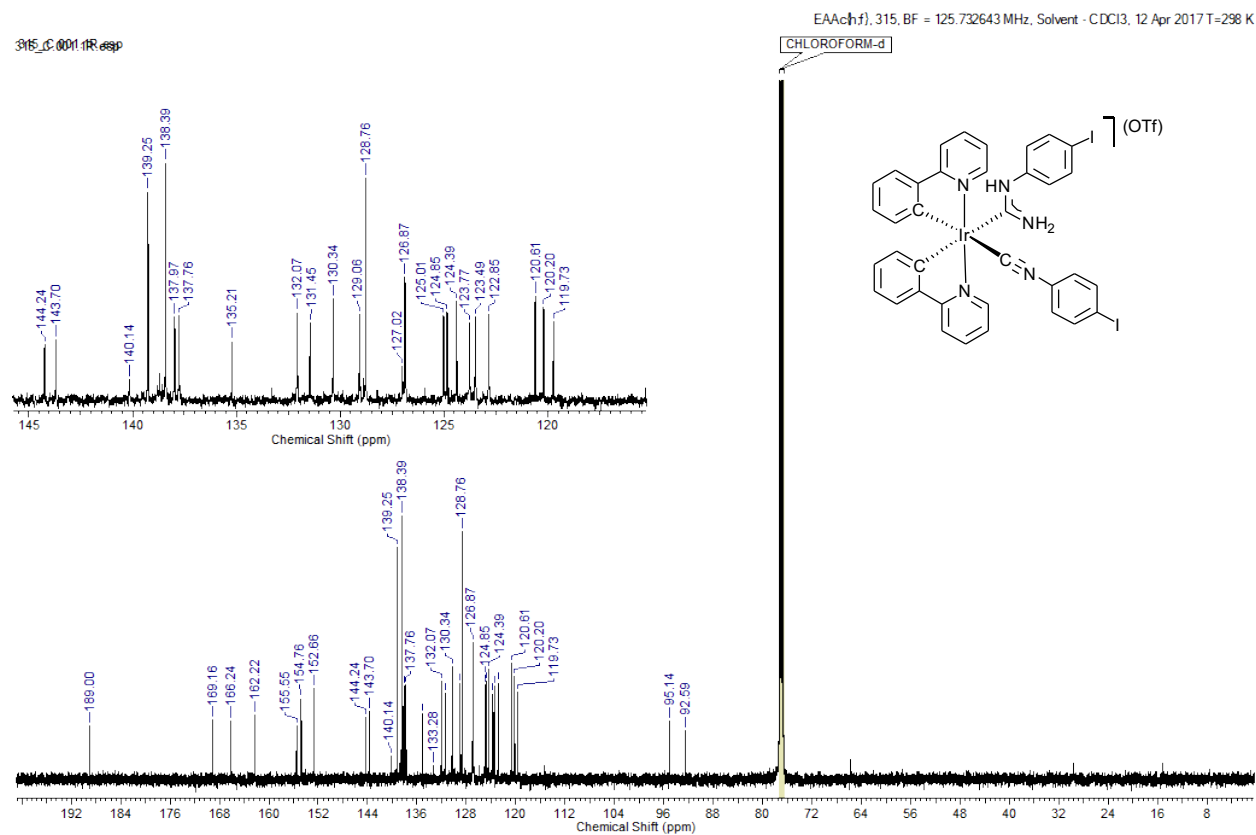

**Figure S20.**  $^{13}\text{C}\{^1\text{H}\}$  NMR spectrum of **[4d](OTf)** in  $\text{CDCl}_3$

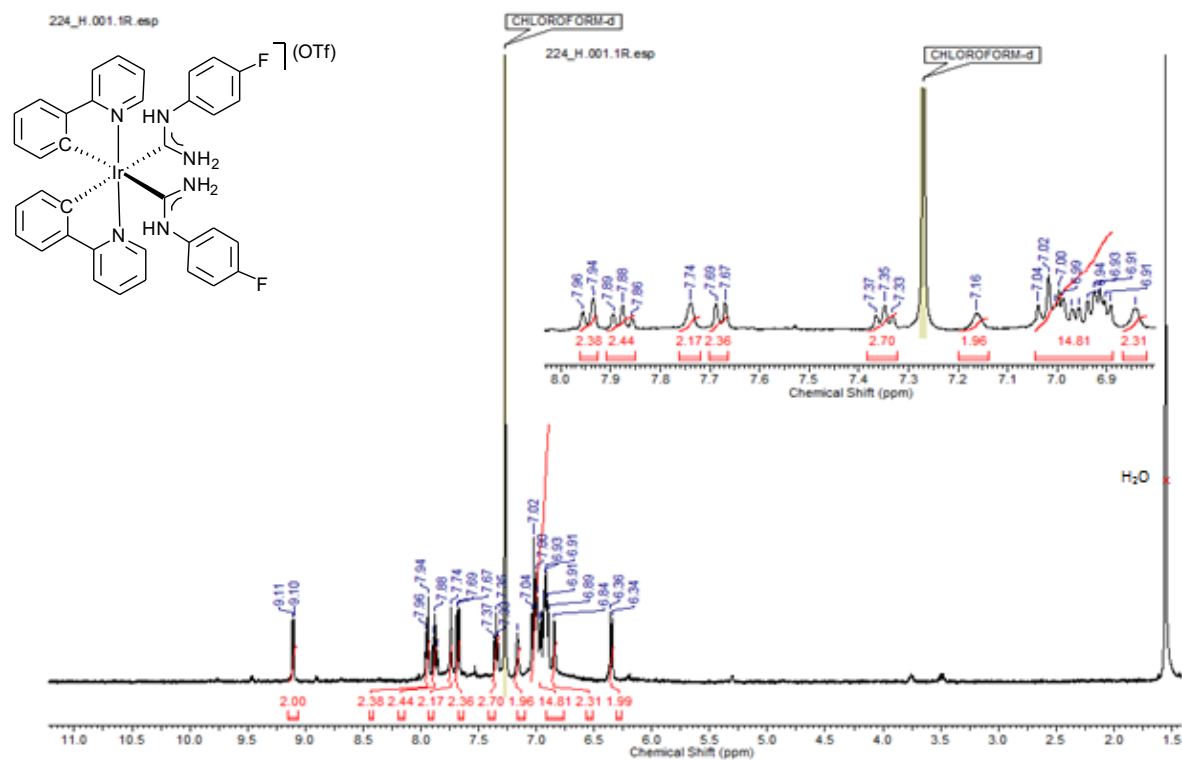

**Figure S21.**  $^1\text{H}$  NMR spectrum of **[5a](OTf)** in  $\text{CDCl}_3$

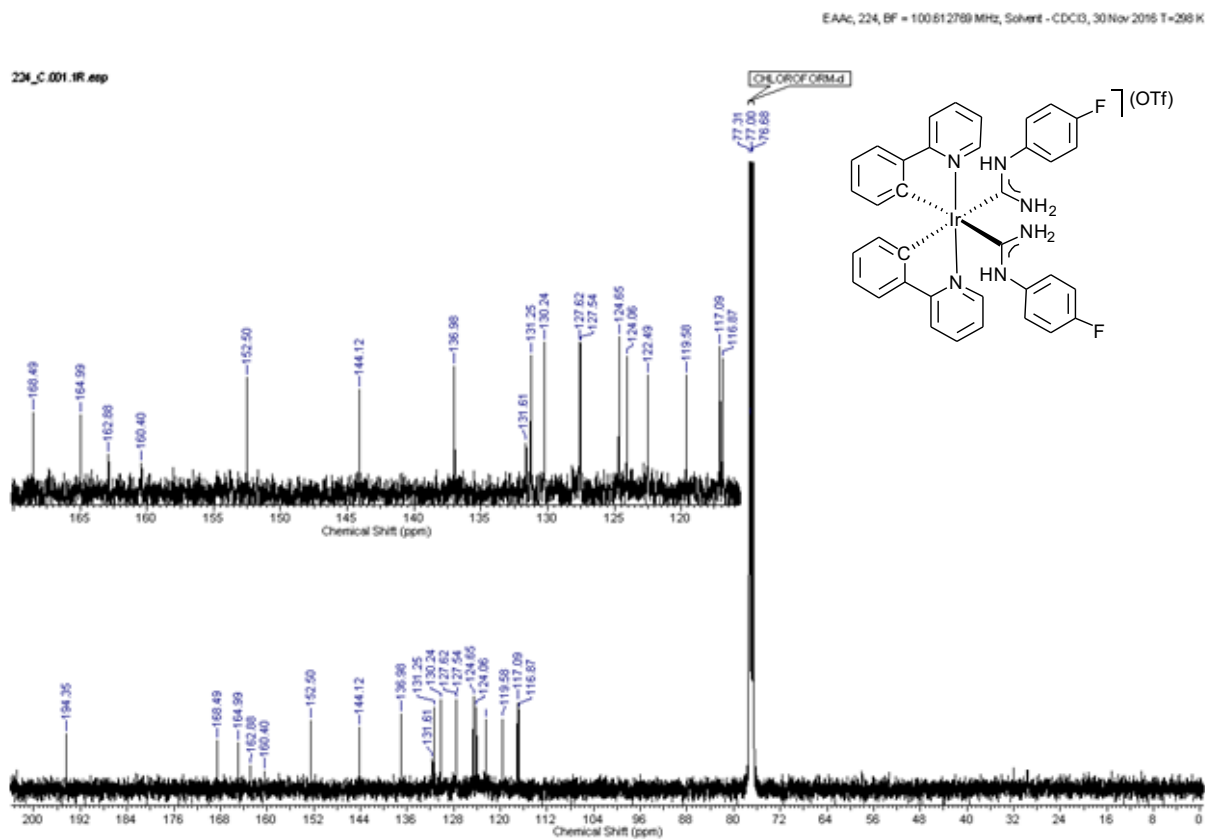

**Figure S22.**  $^{13}\text{C}\{^1\text{H}\}$  NMR spectrum of **[5a](OTf)** in  $\text{CDCl}_3$

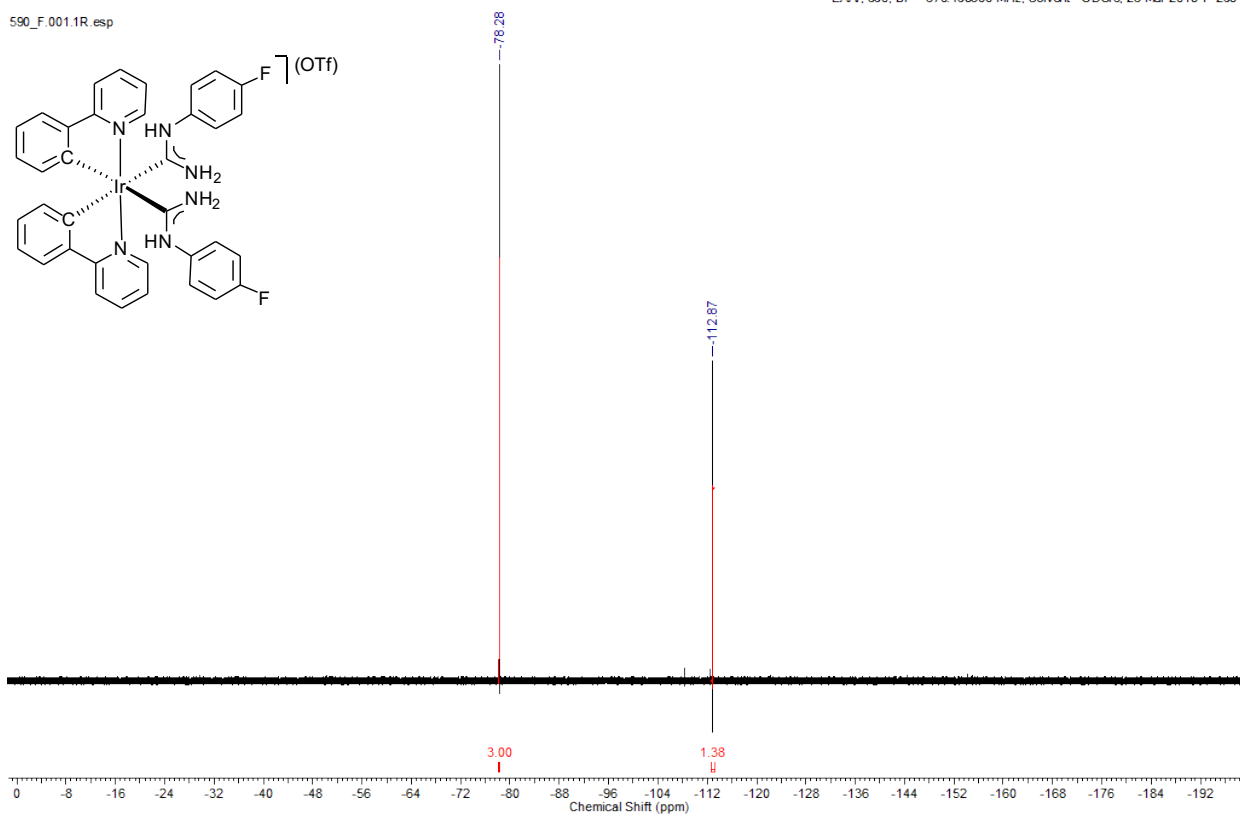

**Figure S23.** <sup>19</sup>F{<sup>1</sup>H} NMR spectrum of [5a](OTf) in CDCl<sub>3</sub>

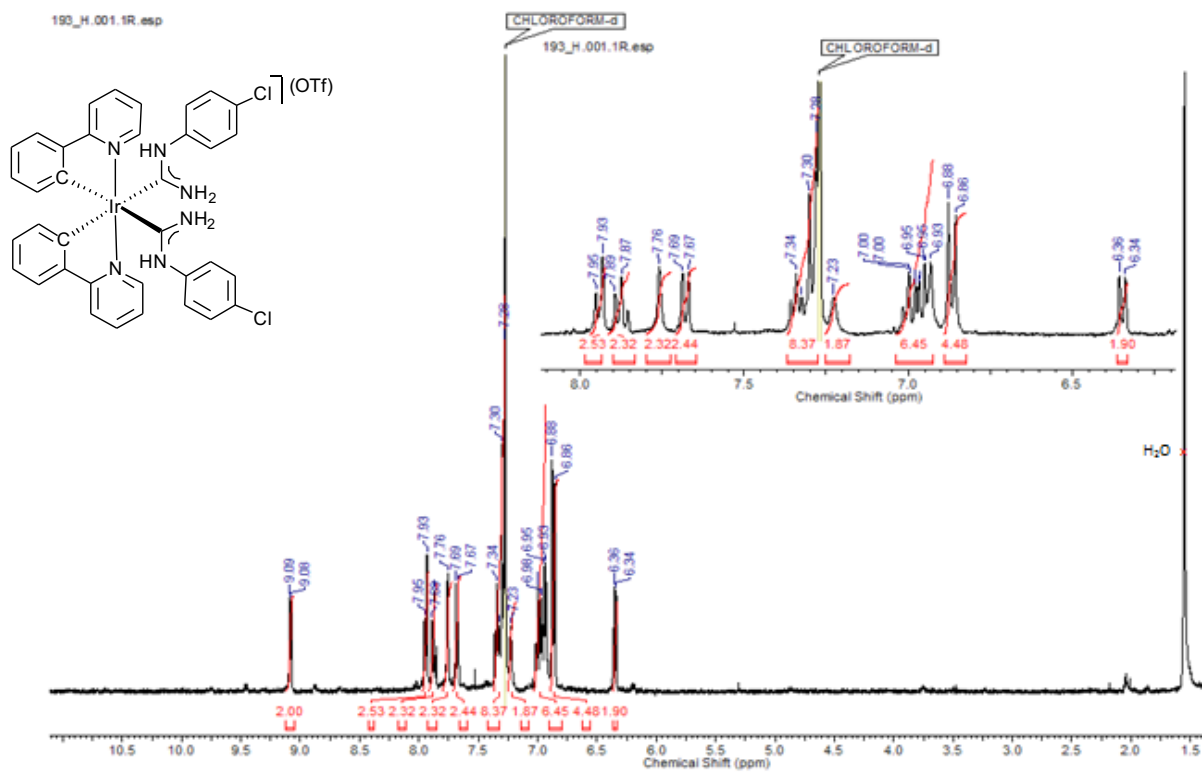

**Figure S24.**  $^1\text{H}$  NMR spectrum of **[5b](OTf)** in  $\text{CDCl}_3$

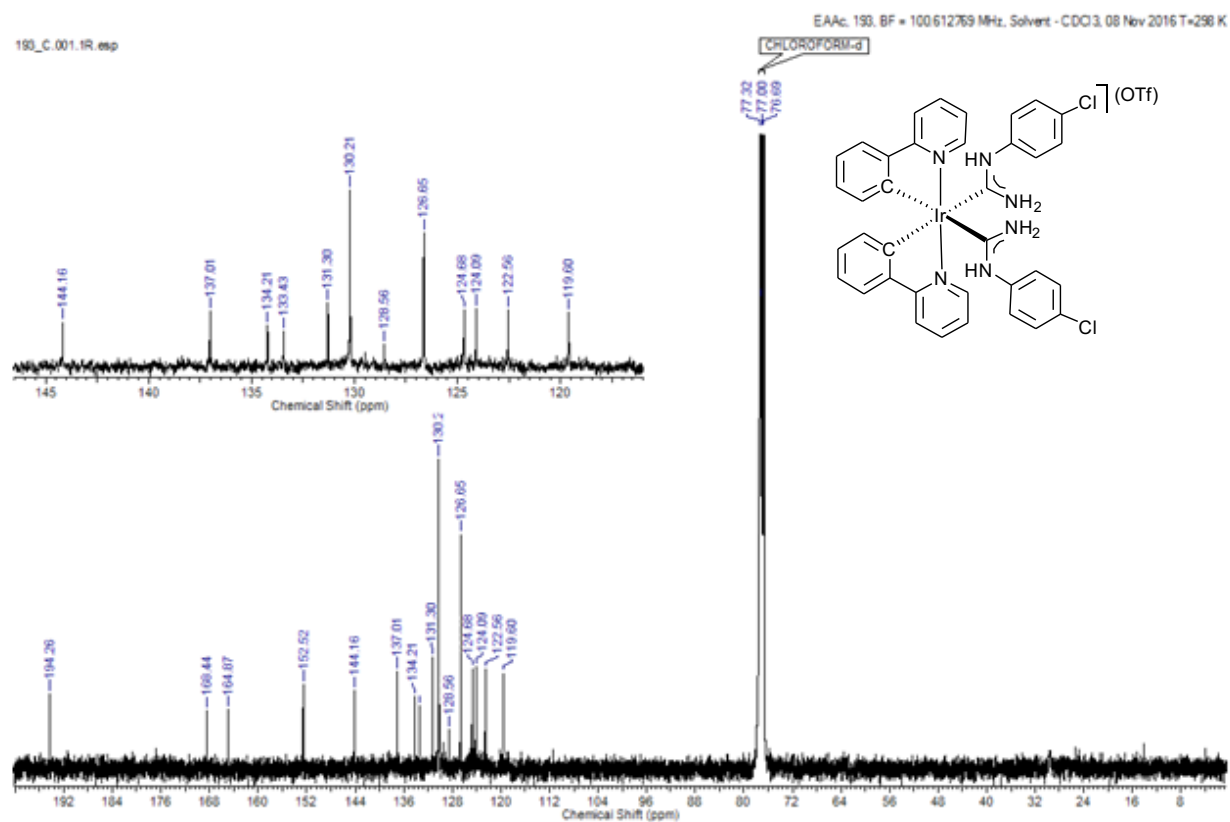

**Figure S25.**  $^{13}\text{C}\{^1\text{H}\}$  NMR spectrum of **[5b](OTf)** in  $\text{CDCl}_3$



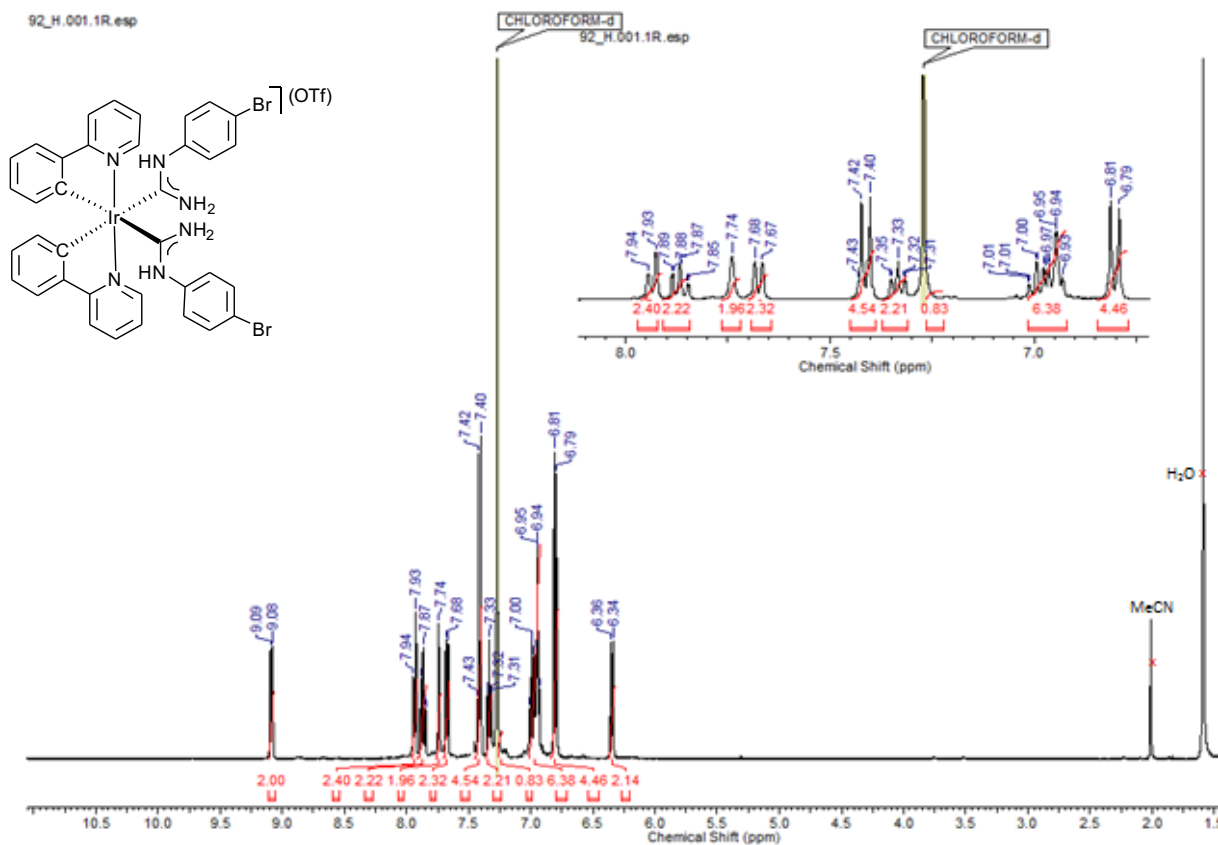

**Figure S26.**  $^1\text{H}$  NMR spectrum of  $[\mathbf{5c}](\text{OTf})$  in  $\text{CDCl}_3$

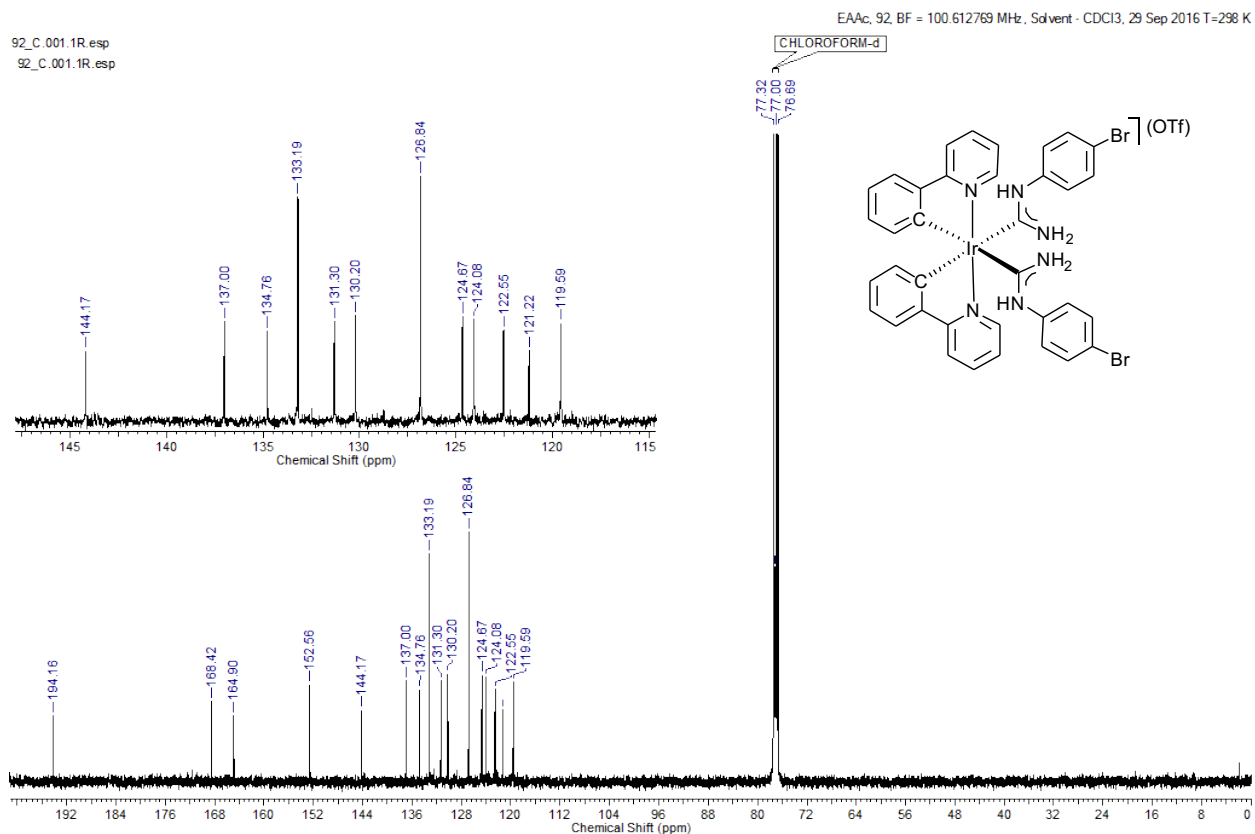

**Figure S27.**  $^{13}\text{C}\{^1\text{H}\}$  NMR spectrum of  $[\mathbf{5c}](\text{OTf})$  in  $\text{CDCl}_3$

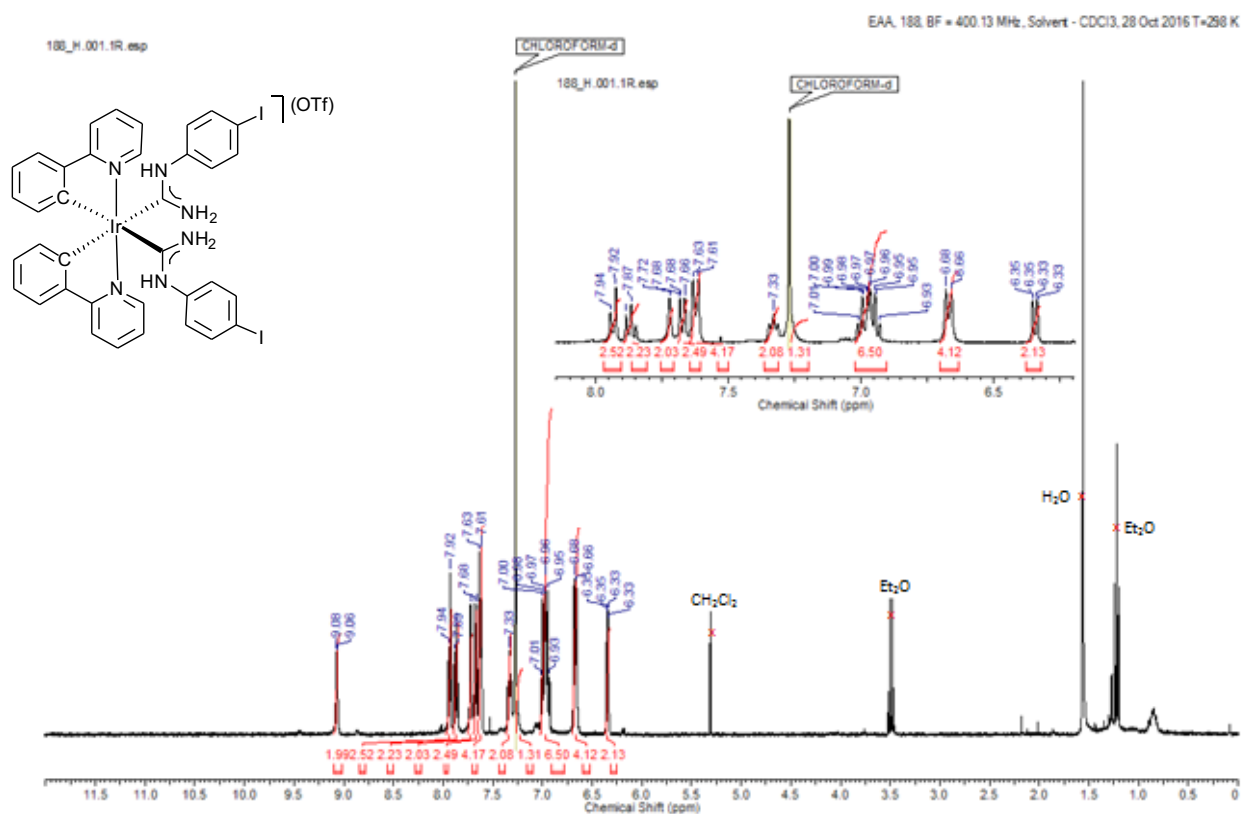

**Figure S28.** <sup>1</sup>H NMR spectrum of [5d](OTf) in CDCl<sub>3</sub>

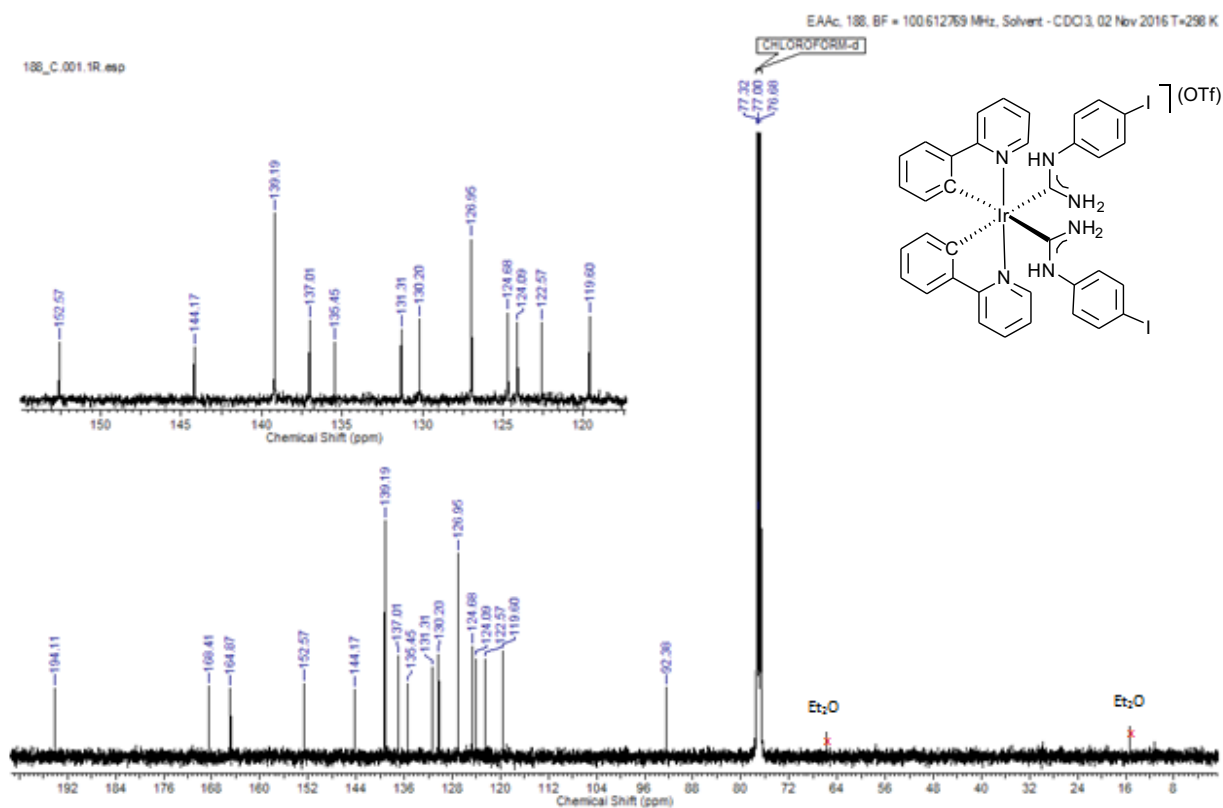

**Figure S29.** <sup>13</sup>C{<sup>1</sup>H} NMR spectrum of [5d](OTf) in CDCl<sub>3</sub>

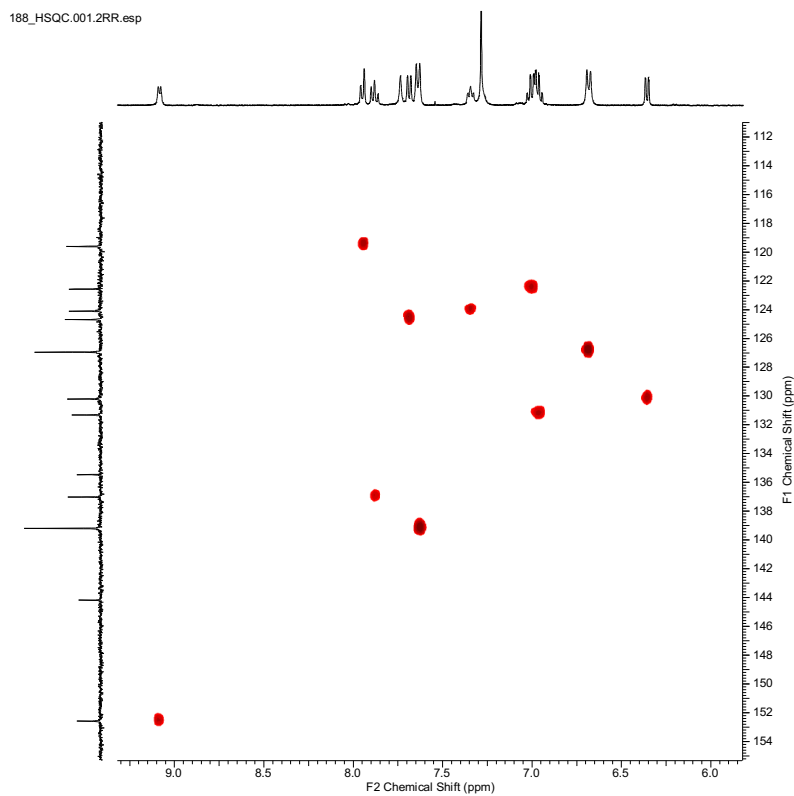

**Figure S30.**  $^1\text{H}$ ,  $^{13}\text{C}$ -HSQC NMR spectrum of **[5d](OTf)** in  $\text{CDCl}_3$

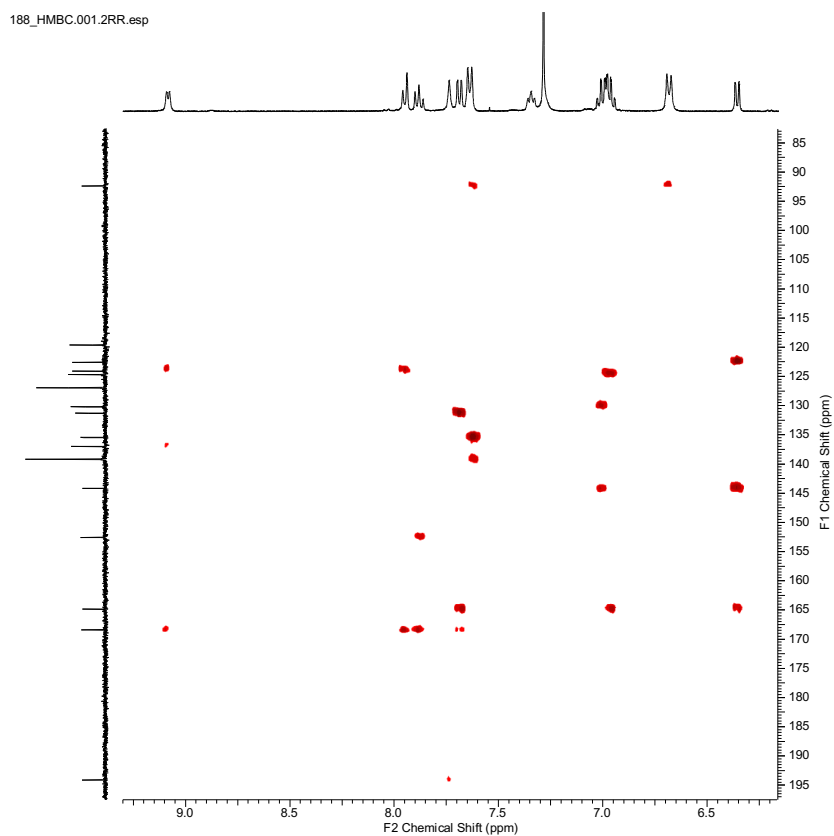

**Figure S31.**  $^1\text{H}$ ,  $^{13}\text{C}$ -HMBC NMR spectrum of **[5d](OTf)** in  $\text{CDCl}_3$



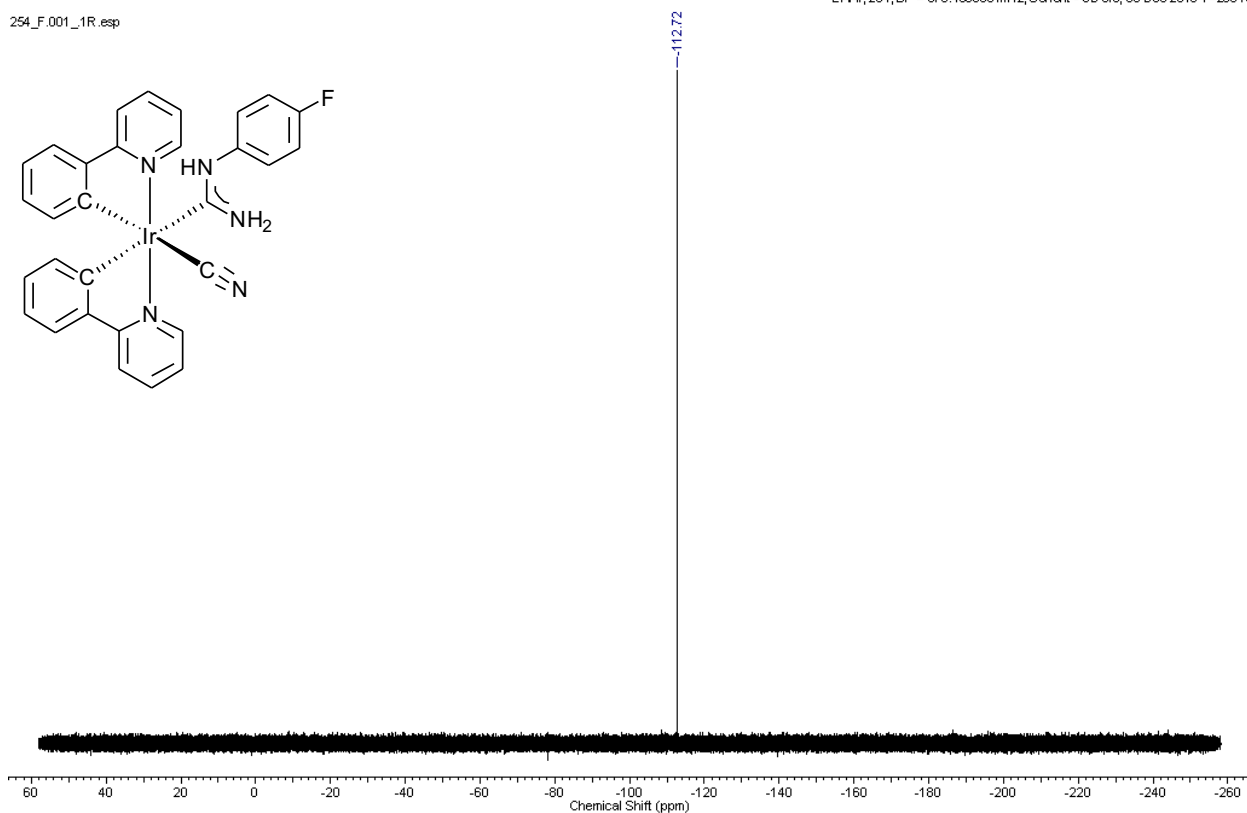

**Figure S34.** <sup>19</sup>F{<sup>1</sup>H} NMR spectrum of **6a** in CDCl<sub>3</sub>





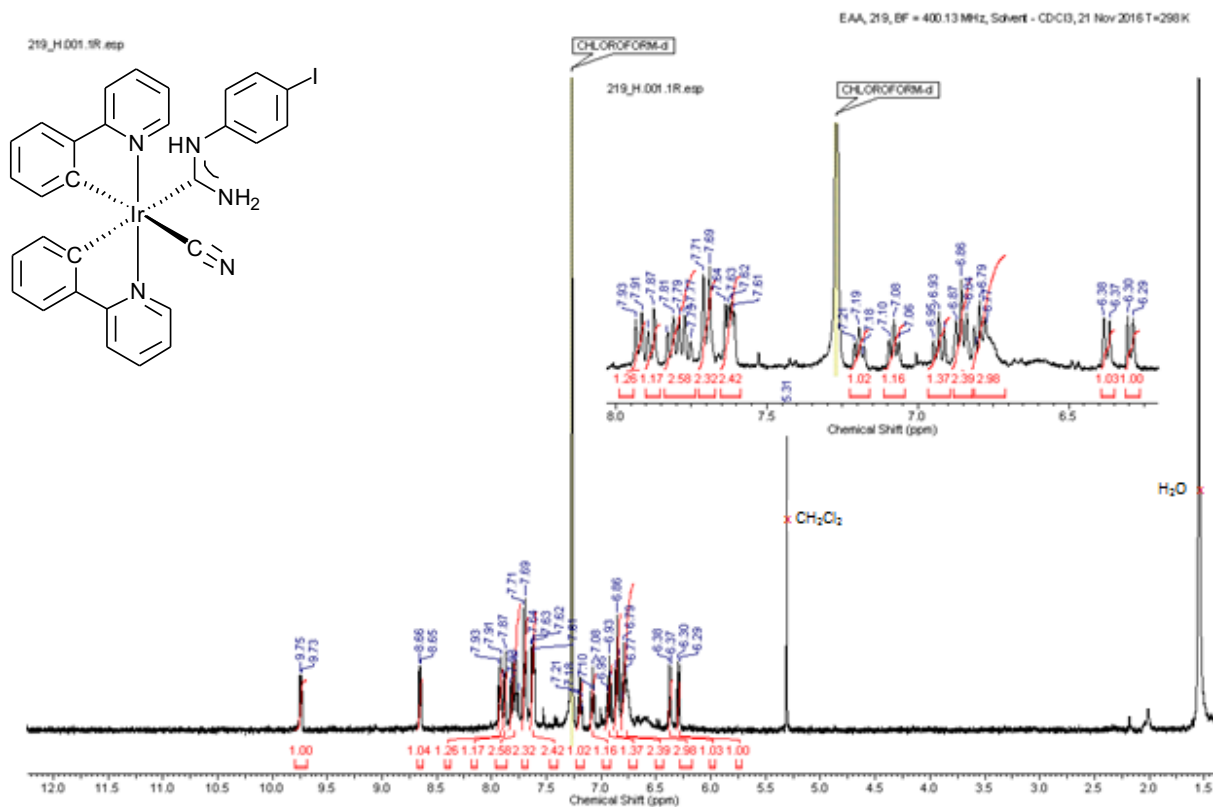

**Figure S39.** <sup>1</sup>H NMR spectrum of **6d** in CDCl<sub>3</sub>



## References

- [1] W. J. Geary, *Coord. Chem. Rev.* **1971**, *7*, 81–122.
- [2] R. A. Michelin, A. J. L. Pombeiro, M. F. C. Guedes da Silva, *Coord. Chem. Rev.* **2001**, *218*, 75–112.
- [3] H. Na, A. Maity, R. Morshed, T. S. Teets, *Organometallics* **2017**, *36*, 2965–2972.
- [4] a) M. A. Kinzhalov, V. P. Boyarskiy, K. V. Luzyanin, F. M. Dolgushin, V. Y. Kukushkin, *Dalton Trans.* **2013**, 10394–10397; b) M. A. Kinzhalov, K. V. Luzyanin, V. P. Boyarskiy, M. Haukka, V. Y. Kukushkin, *Organometallics* **2013**, *32*, 5212–5223; c) M. A. Kinzhalov, K. V. Luzyanin, V. P. Boyarskiy, M. Haukka, V. Y. Kukushkin, *Russ Chem Bull* **2013**, *62*, 758–766; d) E. A. Valishina, M. F. C. Guedes da Silva, M. A. Kinzhalov, S. A. Timofeeva, T. M. Buslaeva, M. Haukka, A. J. L. Pombeiro, V. P. Boyarskiy, V. Y. Kukushkin, K. V. Luzyanin, *J. Mol. Catal. A: Chem.* **2014**, *395*, 162–171; e) S. A. Timofeeva, M. A. Kinzhalov, E. A. Valishina, K. V. Luzyanin, V. P. Boyarskiy, T. M. Buslaeva, M. Haukka, V. Y. Kukushkin, *J. Catal.* **2015**, *329*, 449–456; f) T. B. Anisimova, M. A. Kinzhalov, M. F. C. Guedes da Silva, A. S. Novikov, V. Y. Kukushkin, A. J. L. Pombeiro, K. V. Luzyanin, *New J. Chem.* **2017**, *41*, 3246–3250.
- [5] S.-W. Lai, M. C.-W. Chan, K.-K. Cheung, C.-M. Che, *Organometallics* **1999**, *18*, 3327–3336.
- [6] M. K. Nazeeruddin, R. Humphry-Baker, D. Berner, S. Rivier, L. Zuppiroli, M. Graetzel, *J. Am. Chem. Soc.* **2003**, *125*, 8790–8797.
